# Supplementary material for: Exploring the solid form landscape of the antifungal drug isavuconazole: crystal structure analysis, phase transformation behavior and dissolution performance
Source: Royal Society of Chemistry journal article supplement (doi:10.1039/d1ce01353j), 2021-01-01
Supplement: d1ce01353j1.pdf [file d1ce01353j1.pdf]

## Supporting Information

for publication

### **Exploring the solid form landscape of antifungal drug Isavuconazole: crystal structure analysis, phase transformation behavior and dissolution performance**

*Alexander P. Voronin<sup>a</sup>, Nikita A. Vasilev<sup>a</sup>, Artem O. Surov<sup>a</sup>, Andrei V. Churakov<sup>b</sup>, German L.  
Perlovich<sup>a\*</sup>*

<sup>a</sup>G.A. Krestov Institute of Solution Chemistry of the Russian Academy of Sciences, 1  
Akademicheskaya St., 153045 Ivanovo, Russia

<sup>b</sup>N.S. Kurnakov Institute of General and Inorganic Chemistry RAS, 31 Leninsky Prosp., 119991,  
Moscow, Russia.

\*To whom correspondence should be addressed: Telephone: +7-4932-533784; Fax: +7-4932- 336237; E-mail  
[glp@isc-ras.ru](mailto:glp@isc-ras.ru)

**Table S1.** Results of the polymorph/solvate screening of ISV using different experimental techniques

| Method                   | Solvent                                     | Results                      |
|--------------------------|---------------------------------------------|------------------------------|
| Solution crystallization | Acetone                                     | ISV                          |
| Solution crystallization | Methanol                                    | ISV                          |
| Solution crystallization | Ethanol                                     | ISV                          |
| Solution crystallization | 2-propanol                                  | ISV                          |
| Solution crystallization | Acetonitrile                                | ISV                          |
| Solution crystallization | Dimethylsulfoxide                           | ISV                          |
| Solution crystallization | N,N-Dimethylformamide                       | ISV                          |
| Solution crystallization | Acetonitrile-H <sub>2</sub> O (1:1)         | [ISV+H <sub>2</sub> O] (1:1) |
| Solution crystallization | 2-propanol-H <sub>2</sub> O (3:1)           | [ISV+H <sub>2</sub> O] (1:1) |
| Solution crystallization | Chlorophorm-methanol (1:2)                  | ISV                          |
| Solution crystallization | CHCl <sub>3</sub>                           | noncrystalline               |
| Solution crystallization | Dioxane                                     | noncrystalline               |
| Solution crystallization | Tetrahydrofuran                             | noncrystalline               |
| Freeze drying            | tert-Butyl alcohol-H <sub>2</sub> O (33:67) | Amorphous                    |
| Freeze drying            | tert-Butyl alcohol-H <sub>2</sub> O (50:50) | Amorphous                    |
| Freeze drying            | tert-Butyl alcohol-H <sub>2</sub> O (60:40) | Amorphous                    |
| Freeze drying            | tert-Butyl alcohol-H <sub>2</sub> O (67:33) | Amorphous                    |
| Freeze drying            | tert-Butyl alcohol                          | Amorphous                    |
| Neat grinding            | -                                           | Amorphous                    |

**Table S2.** Results of mechanochemical screening of isavuconazole (ISV) with organic acids of different classes

| Salt former        | Molecular structure                                                                 | Molar ratio<br>(ISV:Coformer) | Solvent          | Results                      |
|--------------------|-------------------------------------------------------------------------------------|-------------------------------|------------------|------------------------------|
| Dicarboxylic acids |                                                                                     |                               |                  |                              |
| Glycolic acid      | 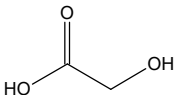   | 1:1                           | H <sub>2</sub> O | ISV                          |
|                    |                                                                                     |                               | ACN              | noncrystalline               |
| Malonic acid       |    | 1:1                           | H <sub>2</sub> O | [ISV-H <sub>2</sub> O] + CF  |
|                    |                                                                                     |                               | ACN              | noncrystalline               |
|                    |                                                                                     | 2:1                           | H <sub>2</sub> O | [ISV-H <sub>2</sub> O] + CF  |
|                    |                                                                                     |                               | ACN              | noncrystalline               |
|                    |                                                                                     | 1:2                           | H <sub>2</sub> O | [ISV-H <sub>2</sub> O] + CF  |
|                    |                                                                                     |                               | ACN              | noncrystalline               |
| Maleic acid        |    | 1:1                           | H <sub>2</sub> O | noncrystalline               |
|                    |                                                                                     |                               | ACN              | noncrystalline               |
|                    |                                                                                     | 2:1                           | H <sub>2</sub> O | noncrystalline               |
|                    |                                                                                     |                               | ACN              | noncrystalline               |
|                    |                                                                                     | 1:2                           | H <sub>2</sub> O | noncrystalline               |
|                    |                                                                                     |                               | ACN              | noncrystalline               |
| Fumaric acid       |   | 1:1                           | H <sub>2</sub> O | [ISV-H <sub>2</sub> O] + CF  |
|                    |                                                                                     |                               | ACN              | noncrystalline               |
|                    |                                                                                     | 2:1                           | H <sub>2</sub> O | [ISV-H <sub>2</sub> O] + CF  |
|                    |                                                                                     |                               | ACN              | noncrystalline               |
|                    |                                                                                     | 1:2                           | H <sub>2</sub> O | [ISV-H <sub>2</sub> O] + CF  |
|                    |                                                                                     |                               | ACN              | noncrystalline               |
| Succinic acid      |  | 1:1                           | H <sub>2</sub> O | ISV + [ISV-H <sub>2</sub> O] |
|                    |                                                                                     |                               | ACN              | noncrystalline               |
|                    |                                                                                     | 2:1                           | H <sub>2</sub> O | [ISV-H <sub>2</sub> O]       |
|                    |                                                                                     |                               | ACN              | noncrystalline               |
|                    |                                                                                     | 1:2                           | H <sub>2</sub> O | [ISV-H <sub>2</sub> O] + CF  |
|                    |                                                                                     |                               | ACN              | noncrystalline               |

|                     |                                                                                     |     |                  |                                   |
|---------------------|-------------------------------------------------------------------------------------|-----|------------------|-----------------------------------|
| Malic acid          | 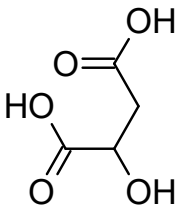   | 1:1 | H <sub>2</sub> O | ISV + [ISV-H <sub>2</sub> O] + CF |
|                     |                                                                                     |     | ACN              | noncrystalline                    |
|                     |                                                                                     | 2:1 | H <sub>2</sub> O | [ISV-H <sub>2</sub> O]            |
|                     |                                                                                     |     | ACN              | noncrystalline                    |
|                     |                                                                                     | 1:2 | H <sub>2</sub> O | [ISV-H <sub>2</sub> O] + CF       |
|                     |                                                                                     |     | ACN              | noncrystalline                    |
| Tartaric acid       |    | 1:1 | H <sub>2</sub> O | ISV + [ISV-H <sub>2</sub> O] + CF |
|                     |                                                                                     |     | ACN              | noncrystalline                    |
|                     |                                                                                     | 2:1 | H <sub>2</sub> O | [ISV-H <sub>2</sub> O]            |
|                     |                                                                                     |     | ACN              | noncrystalline                    |
|                     |                                                                                     | 1:2 | H <sub>2</sub> O | [ISV-H <sub>2</sub> O] + CF       |
|                     |                                                                                     |     | ACN              | noncrystalline                    |
| Glutaric acid       |    | 1:1 | H <sub>2</sub> O | [ISV-H <sub>2</sub> O] + CF       |
|                     |                                                                                     |     | ACN              | noncrystalline                    |
|                     |                                                                                     | 2:1 | H <sub>2</sub> O | [ISV-H <sub>2</sub> O] + CF       |
|                     |                                                                                     |     | ACN              | noncrystalline                    |
|                     |                                                                                     | 1:2 | H <sub>2</sub> O | [ISV-H <sub>2</sub> O] + CF       |
|                     |                                                                                     |     | ACN              | noncrystalline                    |
| trans-Aconitic acid |   | 1:1 | H <sub>2</sub> O | [ISV-H <sub>2</sub> O] + CF       |
|                     |                                                                                     |     | ACN              | noncrystalline                    |
|                     |                                                                                     | 2:1 | H <sub>2</sub> O | [ISV-H <sub>2</sub> O] + CF       |
|                     |                                                                                     |     | ACN              | noncrystalline                    |
|                     |                                                                                     | 1:2 | H <sub>2</sub> O | [ISV-H <sub>2</sub> O] + CF       |
|                     |                                                                                     |     | ACN              | noncrystalline                    |
| Citric acid         |  | 1:1 | H <sub>2</sub> O | noncrystalline                    |
|                     |                                                                                     |     | ACN              | noncrystalline                    |
|                     |                                                                                     | 2:1 | H <sub>2</sub> O | noncrystalline                    |
|                     |                                                                                     |     | ACN              | noncrystalline                    |
|                     |                                                                                     | 1:2 | H <sub>2</sub> O | noncrystalline                    |
|                     |                                                                                     |     | ACN              | noncrystalline                    |



|                       |                                                                                     |     |                  |                                   |
|-----------------------|-------------------------------------------------------------------------------------|-----|------------------|-----------------------------------|
| Adipic acid           | 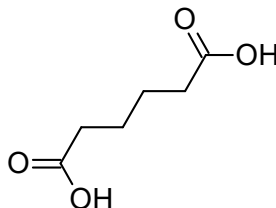   | 1:1 | H <sub>2</sub> O | ISV + [ISV-H <sub>2</sub> O] + CF |
|                       |                                                                                     |     | ACN              | noncrystalline                    |
|                       |                                                                                     | 2:1 | H <sub>2</sub> O | ISV + [ISV-H <sub>2</sub> O]      |
|                       |                                                                                     |     | ACN              | noncrystalline                    |
|                       |                                                                                     | 1:2 | H <sub>2</sub> O | [ISV-H <sub>2</sub> O] + CF       |
|                       |                                                                                     |     | ACN              | noncrystalline                    |
| Pimelic acid          |    | 1:1 | H <sub>2</sub> O | [ISV-H <sub>2</sub> O]+ CF        |
|                       |                                                                                     |     | ACN              | noncrystalline                    |
|                       |                                                                                     | 2:1 | H <sub>2</sub> O | [ISV-H <sub>2</sub> O]+ CF        |
|                       |                                                                                     |     | ACN              | noncrystalline                    |
|                       |                                                                                     | 1:2 | H <sub>2</sub> O | [ISV-H <sub>2</sub> O]+ CF        |
|                       |                                                                                     |     | ACN              | noncrystalline                    |
| Aromatic acids        |                                                                                     |     |                  |                                   |
| Benzoic acid          |    | 1:1 | H <sub>2</sub> O | [ISV-H <sub>2</sub> O] + CF       |
|                       |                                                                                     |     | ACN              | noncrystalline                    |
| Salicylic acid        |    | 1:1 | H <sub>2</sub> O | ISV + CF                          |
|                       |                                                                                     |     | ACN              | noncrystalline                    |
| 4-Hydroxybenzoic acid |   | 1:1 | H <sub>2</sub> O | [ISV-H <sub>2</sub> O]+ ISV + CF  |
|                       |                                                                                     |     | ACN              | noncrystalline                    |
| Gallic acid           |  | 1:1 | H <sub>2</sub> O | [ISV-H <sub>2</sub> O] + CF       |
|                       |                                                                                     |     | ACN              | noncrystalline                    |

|                        |                                                                                     |      |                  |                                   |
|------------------------|-------------------------------------------------------------------------------------|------|------------------|-----------------------------------|
| Vanillic acid          | 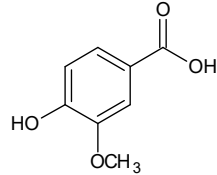   | 1:1  | H <sub>2</sub> O | [ISV-H <sub>2</sub> O]            |
|                        |                                                                                     |      | ACN              | noncrystalline                    |
| 4-Aminobenzoic acid    |    | 1:1  | H <sub>2</sub> O | [ISV-H <sub>2</sub> O] + CF       |
|                        |                                                                                     |      | ACN              | noncrystalline                    |
| Terephthalic acid      |    | 1:1  | H <sub>2</sub> O | [ISV-H <sub>2</sub> O] + ISV + CF |
|                        |                                                                                     |      | ACN              | noncrystalline                    |
| Sulfonic acids         |                                                                                     |      |                  |                                   |
| Saccharine             |    | 1:1  | H <sub>2</sub> O | [ISV-H <sub>2</sub> O]+ CF        |
|                        |                                                                                     |      | ACN              | noncrystalline                    |
| Acesulfame             |    | 1:1  | H <sub>2</sub> O | ISV + CF                          |
|                        |                                                                                     |      | ACN              | noncrystalline                    |
| Methanesulfonic acid   |   | 1:10 | H <sub>2</sub> O | ISV + [ISV-H <sub>2</sub> O] + CF |
|                        |                                                                                     | 1:10 | ACN              | noncrystalline                    |
| p-Toluenesulfonic acid |  | 1:1  | H <sub>2</sub> O | noncrystalline                    |
|                        |                                                                                     |      | ACN              | [ISV-TS-ACN]                      |

**Table S3.** Results of slurry screening of isavuconazole (ISV) with inorganic acids

| Inorganic acids      |                                                                                                               |                               |                             |                              |
|----------------------|---------------------------------------------------------------------------------------------------------------|-------------------------------|-----------------------------|------------------------------|
| Salt former          | Molecular structure                                                                                           | Molar ratio<br>(ISV:Coformer) | Solvent                     | Results                      |
| Orthophosphoric acid | $\begin{array}{c} \text{O} \\ \parallel \\ \text{HO}-\text{P}-\text{OH} \\   \\ \text{OH} \end{array}$        | 1:10                          | EtOH-H <sub>2</sub> O (1:1) | [ISV-P] (1:1)                |
| Sulfuric acid        | $\begin{array}{c} \text{O} \\ \parallel \\ \text{HO}-\text{S}-\text{OH} \\ \parallel \\ \text{O} \end{array}$ | 1:10                          | H <sub>2</sub> O            | [ISV-H <sub>2</sub> O] (1:1) |
| Hydrochloric acid    | HCl                                                                                                           | 1:10                          | MeOH-H <sub>2</sub> O (1:1) | [ISV-H <sub>2</sub> O] (1:1) |

**Table S4.** Crystallographic data for obtained crystal forms of ISV

|                                                                                                                            | ISV                                                              | [ISV-H <sub>2</sub> O] (1:1)                                                          | [ISV-TS-ACN]<br>(1:1:0.212)                                                                                                                                    | [ISV-P] (1:1)                                                                                              |
|----------------------------------------------------------------------------------------------------------------------------|------------------------------------------------------------------|---------------------------------------------------------------------------------------|----------------------------------------------------------------------------------------------------------------------------------------------------------------|------------------------------------------------------------------------------------------------------------|
| <b>Crystal data</b>                                                                                                        |                                                                  |                                                                                       |                                                                                                                                                                |                                                                                                            |
| CCDC no.                                                                                                                   | 2113413                                                          | 2113411                                                                               | 2113410                                                                                                                                                        | 2113412                                                                                                    |
| Chemical formula                                                                                                           | C <sub>22</sub> H <sub>17</sub> F <sub>2</sub> N <sub>5</sub> OS | C <sub>22</sub> H <sub>17</sub> F <sub>2</sub> N <sub>5</sub> OS·<br>H <sub>2</sub> O | C <sub>22</sub> H <sub>18</sub> F <sub>2</sub> N <sub>5</sub> OS·<br>C <sub>7</sub> H <sub>7</sub> O <sub>3</sub> S·<br>0.212(C <sub>2</sub> H <sub>3</sub> N) | C <sub>22</sub> H <sub>17.52</sub> F <sub>2</sub> N <sub>5</sub> OS·<br>H <sub>2.48</sub> O <sub>4</sub> P |
| <i>M</i> <sub>r</sub>                                                                                                      | 437.46                                                           | 455.48                                                                                | 618.35                                                                                                                                                         | 535.46                                                                                                     |
| Crystal system                                                                                                             | Monoclinic                                                       | Orthorhombic                                                                          | Monoclinic                                                                                                                                                     | Orthorhombic                                                                                               |
| Space group                                                                                                                | <i>P</i> 2 <sub>1</sub>                                          | <i>P</i> 2 <sub>1</sub> 2 <sub>1</sub> 2 <sub>1</sub>                                 | <i>C</i> 2                                                                                                                                                     | <i>P</i> 2 <sub>1</sub> 2 <sub>1</sub> 2 <sub>1</sub>                                                      |
| Temperature (K)                                                                                                            | 100                                                              | 150                                                                                   | 150                                                                                                                                                            | 100                                                                                                        |
| <i>a</i> (Å)                                                                                                               | 5.8250 (3)                                                       | 7.8920 (2)                                                                            | 29.078 (4)                                                                                                                                                     | 6.1215 (3)                                                                                                 |
| <i>b</i> (Å)                                                                                                               | 17.3293 (8)                                                      | 11.2256 (3)                                                                           | 8.7230 (12)                                                                                                                                                    | 11.1722 (5)                                                                                                |
| <i>c</i> (Å)                                                                                                               | 9.7547 (4)                                                       | 24.2967 (6)                                                                           | 12.0174 (16)                                                                                                                                                   | 34.3989 (17)                                                                                               |
| $\alpha$ (°)                                                                                                               | 90                                                               | 90                                                                                    | 90                                                                                                                                                             | 90                                                                                                         |
| $\beta$ (°)                                                                                                                | 97.072 (2)                                                       | 90                                                                                    | 93.915 (6)                                                                                                                                                     | 90                                                                                                         |
| $\gamma$ (°)                                                                                                               | 90                                                               | 90                                                                                    | 90                                                                                                                                                             | 90                                                                                                         |
| <i>V</i> (Å <sup>3</sup> )                                                                                                 | 977.18 (8)                                                       | 2152.50 (10)                                                                          | 3041.1 (7)                                                                                                                                                     | 2352.56 (19)                                                                                               |
| <i>Z</i>                                                                                                                   | 2                                                                | 4                                                                                     | 4                                                                                                                                                              | 4                                                                                                          |
| Radiation type                                                                                                             | Mo <i>K</i> α                                                    | Mo <i>K</i> α                                                                         | Mo <i>K</i> α                                                                                                                                                  | Mo <i>K</i> α                                                                                              |
| $\mu$ (mm <sup>-1</sup> )                                                                                                  | 0.21                                                             | 0.20                                                                                  | 0.23                                                                                                                                                           | 0.27                                                                                                       |
| Crystal size (mm)                                                                                                          | 0.25×0.20×0.10                                                   | 0.30×0.12×0.10                                                                        | 0.40×0.12×0.03                                                                                                                                                 | 0.30×0.10×0.05                                                                                             |
| <b>Data collection</b>                                                                                                     |                                                                  |                                                                                       |                                                                                                                                                                |                                                                                                            |
| <i>T</i> <sub>min</sub> , <i>T</i> <sub>max</sub>                                                                          | 0.394, 0.754                                                     | 0.664, 0.746                                                                          | 0.356, 0.752                                                                                                                                                   | 0.402, 0.753                                                                                               |
| Reflns. measured                                                                                                           | 42105                                                            | 18824                                                                                 | 8833                                                                                                                                                           | 26066                                                                                                      |
| Independent reflns.                                                                                                        | 5667                                                             | 4693                                                                                  | 5000                                                                                                                                                           | 6870                                                                                                       |
| observed reflns.<br>with [ <i>I</i> > 2 <i>s</i> ( <i>I</i> )]                                                             | 5522                                                             | 4447                                                                                  | 4268                                                                                                                                                           | 6622                                                                                                       |
| <i>R</i> <sub>int</sub>                                                                                                    | 0.032                                                            | 0.024                                                                                 | 0.042                                                                                                                                                          | 0.030                                                                                                      |
| (sin $\theta$ / <i>l</i> ) <sub>max</sub> (Å <sup>-1</sup> )                                                               | 0.703                                                            | 0.639                                                                                 | 0.617                                                                                                                                                          | 0.703                                                                                                      |
| <b>Refinement</b>                                                                                                          |                                                                  |                                                                                       |                                                                                                                                                                |                                                                                                            |
| <i>R</i> [ <i>F</i> <sup>2</sup> > 2 <i>s</i> ( <i>F</i> <sup>2</sup> )],<br><i>wR</i> ( <i>F</i> <sup>2</sup> ), <i>S</i> | 0.026, 0.066, 1.05                                               | 0.029, 0.071, 1.03                                                                    | 0.062, 0.145, 1.05                                                                                                                                             | 0.028, 0.067, 1.06                                                                                         |
| No. of reflections                                                                                                         | 5667                                                             | 4693                                                                                  | 5000                                                                                                                                                           | 6870                                                                                                       |
| No. of parameters                                                                                                          | 348                                                              | 365                                                                                   | 416                                                                                                                                                            | 408                                                                                                        |
| No. of restraints                                                                                                          | 1                                                                | 0                                                                                     | 13                                                                                                                                                             | 0                                                                                                          |
| ( $\Delta$ / $\sigma$ ) <sub>max</sub>                                                                                     | < 0.001                                                          | 0.001                                                                                 | < 0.001                                                                                                                                                        | 0.002                                                                                                      |
| $\Delta$ <sub>max</sub> , $\Delta$ <sub>min</sub> (e Å <sup>-3</sup> )                                                     | 0.31, -0.19                                                      | 0.20, -0.16                                                                           | 0.31, -0.34                                                                                                                                                    | 0.30, -0.28                                                                                                |

**Table S5.** Contributions into the crystal lattice energy from the components and different kinds of non-covalent interactions in the crystal forms of ISV estimated by QTAIMC and given in kJ·mol<sup>-1</sup> and % of total lattice energy value.

| Crystal                     | ISV <sub>CR</sub> | [ISV-H <sub>2</sub> O]<br>(1:1) | [ISV-TS]<br>(1:1) | [ISV-TS-ACN]<br>(1:1:1) | [ISV-P] (1:1)<br>salt | [ISV-P] (1:1)<br>cocrystal |
|-----------------------------|-------------------|---------------------------------|-------------------|-------------------------|-----------------------|----------------------------|
| E <sub>latt</sub> (0K)      | <b>136.4</b>      | <b>214.5</b>                    | <b>237.4</b>      | <b>305.1</b>            | <b>366.6</b>          | <b>337.5</b>               |
| ΣE <sub>int</sub> (H-bonds) | 0 (0%)            | 93.9 (43.8%)                    | 39.5 (16.6%)      | 40.6 (13.3%)            | 186.7 (50.9%)         | 165.1 (48.9%)              |
| ΣE <sub>int</sub> (C-H···X) | 55.5 (39.3%)      | 87.3 (40.7%)                    | 120.2 (50.6%)     | 160.8(52.7%)            | 106.6 (29.1%)         | 103.7(30.7%)               |
| ΣE <sub>int</sub> (C-H···π) | 16.4 (11.6%)      | 18.2 (8.5%)                     | 28.6 (12.0%)      | 37.8 (12.4%)            | 5.949 (1.6%)          | 6.5 (1.9%)                 |
| ΣE <sub>int</sub> (π···π)   | 58.3 (41.3%)      | 6.3 (2.9%)                      | 40.6 (17.1%)      | 50.4 (16.5%)            | 62.7 (17.1%)          | 62.3 (18.5%)               |
| ΣE <sub>int</sub> (vdW)     | 11.2 (7.9%)       | 8.8 (4.1%)                      | 8.6 (3.6%)        | 15.5 (5.1%)             | 4.6 (1.3%)            | 2.3 (0.7%)                 |
| ΣE <sub>int</sub> (ISV–ISV) | –                 | 89.8 (41.9%)                    | 62.6 (26.4%)      | 65.6 (21.5%)            | 99.3 (27.1%)          | 106.0 (31.4%)              |
| ΣE <sub>int</sub> (ISV–CF)  | –                 | 124.7 (58.1%)                   | 173.6 (73.1%)     | 173.8 (57.0%)           | 157.1 (42.9%)         | 123.7 (36.6%)              |
| ΣE <sub>int</sub> (CF–CF)   | –                 | 0 (0%)                          | 1.1 (0.5%)        | 0 (0%)                  | 110.1 (30.0%)         | 107.8 (32.0%)              |
| ΣE <sub>int</sub> (ISV–ACN) | –                 | –                               | –                 | 49.1 (16.1%)            | –                     | –                          |
| ΣE <sub>int</sub> (CF–ACN)  | –                 | –                               | –                 | 13.7 (4.5%)             | –                     | –                          |
| ΣE <sub>int</sub> (ACN–ACN) | –                 | –                               | –                 | 2.9 (0.9%)              | –                     | –                          |
| ΣE <sub>int</sub> (ISV)     | –                 | 152.1 (70.9%)                   | 149.4 (63.0%)     | 177.1 (58.0%)           | 177.9 (48.5%)         | 167.8 (49.7%)              |
| ΣE <sub>int</sub> (CF)      | –                 | 62.3 (29.1%)                    | 88.0 (37.0%)      | 93.7 (30.7%)            | 188.7 (51.5%)         | 169.7 (50.3%)              |
| ΣE <sub>int</sub> (ACN)     | –                 | –                               | –                 | 34.3 (11.2%)            | –                     | –                          |

CF = coformer

X = C, O, N, F

## S1. Evaluation of performance of different theoretical schemes for lattice energy evaluation

In order to study in details the energetics of crystal forms of an API, one needs to ensure that the applied method provides reliable and accurate results. The best criterion for a valid theoretical method is its capability to reproduce the experimental data. Most commonly used approaches for lattice energy estimation are usually validated against a benchmark set of simple organic molecules that may be irrelevant to “real-life” pharmaceuticals. As it was demonstrated by our group, see Refs. <sup>1, 2</sup>, well-proven methods can fail to reproduce the crystal lattice energy of some APIs. Therefore, testing multiple independent computational methods is required in order to avoid incorrect estimation of energetic features of solid forms.

In the present work, the crystal lattice energy of pure ISV was estimated using several computational methods based on different approaches: DFT-D3 (eq. 1), QTAIMC (eq. 3), and semi-empirical PIXEL, AA-CLP and CE-B3LYP schemes. The lattice energy at 298K was derived using a 2RT correction and compared with the recently determined experimental sublimation enthalpy value obtained by transpiration ( $138.1 \pm 0.5$  kJ mol<sup>-1</sup>). <sup>3</sup>

The values of theoretical lattice energies and sublimation enthalpy of pure ISV taken from the literature are summarized in Table S6. One can see that the  $E_{latt}(298K)$  value obtained from QTAIMC calculations (136.4 kJ mol<sup>-1</sup>) is in a good agreement with the experiment, while other methods overestimate this value by 24-70%. Therefore, QTAIMC was used further as most appropriate method to describe lattice energies and energies of individual non-covalent interactions in multicomponent crystal forms of ISV.

**Table S6.** Comparison of theoretical and experimental lattice energies of pure ISV at 298 K obtained by different theoretical and experimental approaches

| Calculated |        |       |        |          | Exp. <sup>3</sup> |
|------------|--------|-------|--------|----------|-------------------|
| DFT-D3     | QTAIMC | PIXEL | AA-CLP | CE-B3LYP |                   |
| 171.1      | 136.4  | 183.7 | 235.4  | 199.7    | 138.1±0.5         |

## S2. Conformational stability of ISV molecules in different crystal forms.

In order to rationalize the fact that  $\text{ISV}_{\text{CR}}$  does not transfer into  $[\text{ISV-H}_2\text{O}]$  (1:1) when placed into contact with water we estimated the relative energies and the conformation barrier height of the isolated ISV molecules and ISV- $\text{H}_2\text{O}$  complexes using the PCM model. The energetic barrier height between the “open” and “closed” conformations in the solution equals to  $25.1 \text{ kJ mol}^{-1}$ , which exceeds the energy of thermal vibrations but is lower than the typical activation energy of the nucleation process.<sup>4</sup> (Scheme S1)

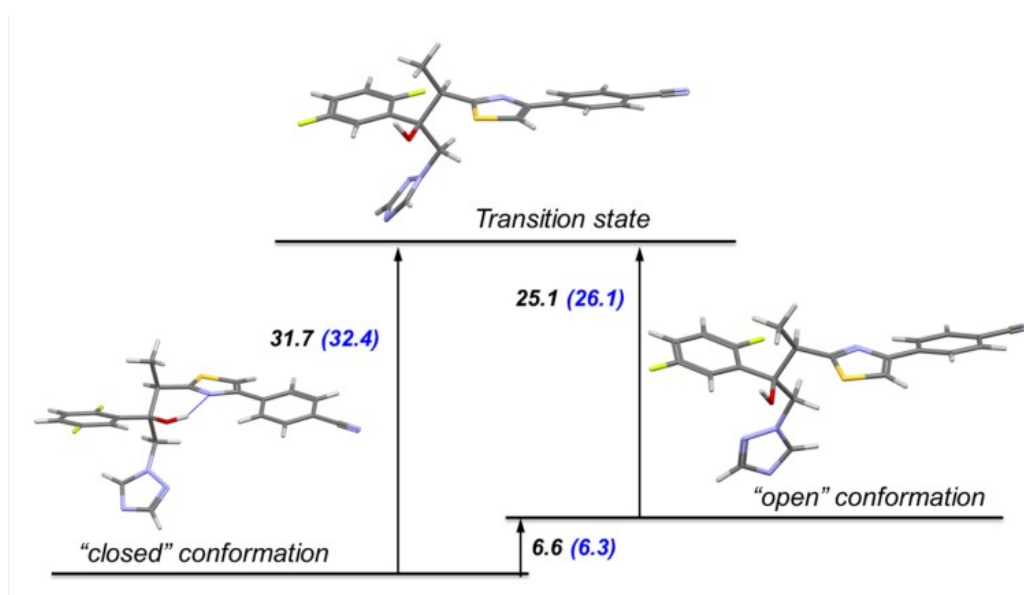

**Scheme S1.** Energy ranking of relaxed ISV molecules corresponding to “open” and “closed” conformations observed in ISV and  $[\text{ISV-H}_2\text{O}]$  crystal structures. The numbers indicate the relative energies between the conformations and the transition state of isolated ISV molecules (blue for ISV- $\text{H}_2\text{O}$  complexes) in  $\text{kJ mol}^{-1}$ .

When a molecule of water is placed near the hydroxyl group, the relative energies do not change significantly, resulting in  $\Delta E = 6.3 \text{ kJ}\cdot\text{mol}^{-1}$  and barrier height of  $26.1 \text{ kJ}\cdot\text{mol}^{-1}$  (Figure 8). While the transition between the “open” and “closed” conformations is possible in solution, the size and shape of the ISV molecule make impossible the direct solid-solid transformation in the condensed state caused by the conformation change due to steric hindrances. This explains the absence of a crystalline phase after the thermal dehydration of  $[\text{ISV-H}_2\text{O}]$  (1:1) and kinetic stabilization of anhydrous ISV when the solid is placed in contact with water.

## References:

1. A. N. Manin, A. P. Voronin, K. V. Drozd and G. L. Perlovich, *Thermochimica Acta*, 2019, **682**, 178411.
2. K. V. Drozd, A. N. Manin, A. P. Voronin and G. L. Perlovich, *The Journal of Chemical Thermodynamics*, 2021, **155**, 106369.
3. M. Ol'khovich, A. Sharapova, S. Blokhina and G. Perlovich, *Molecules*, 2021, **26**, 4759.
4. S. K. Tang, R. J. Davey, P. Sacchi and A. J. Cruz-Cabeza, *Chemical Science*, 2021, **12**, 993-1000.

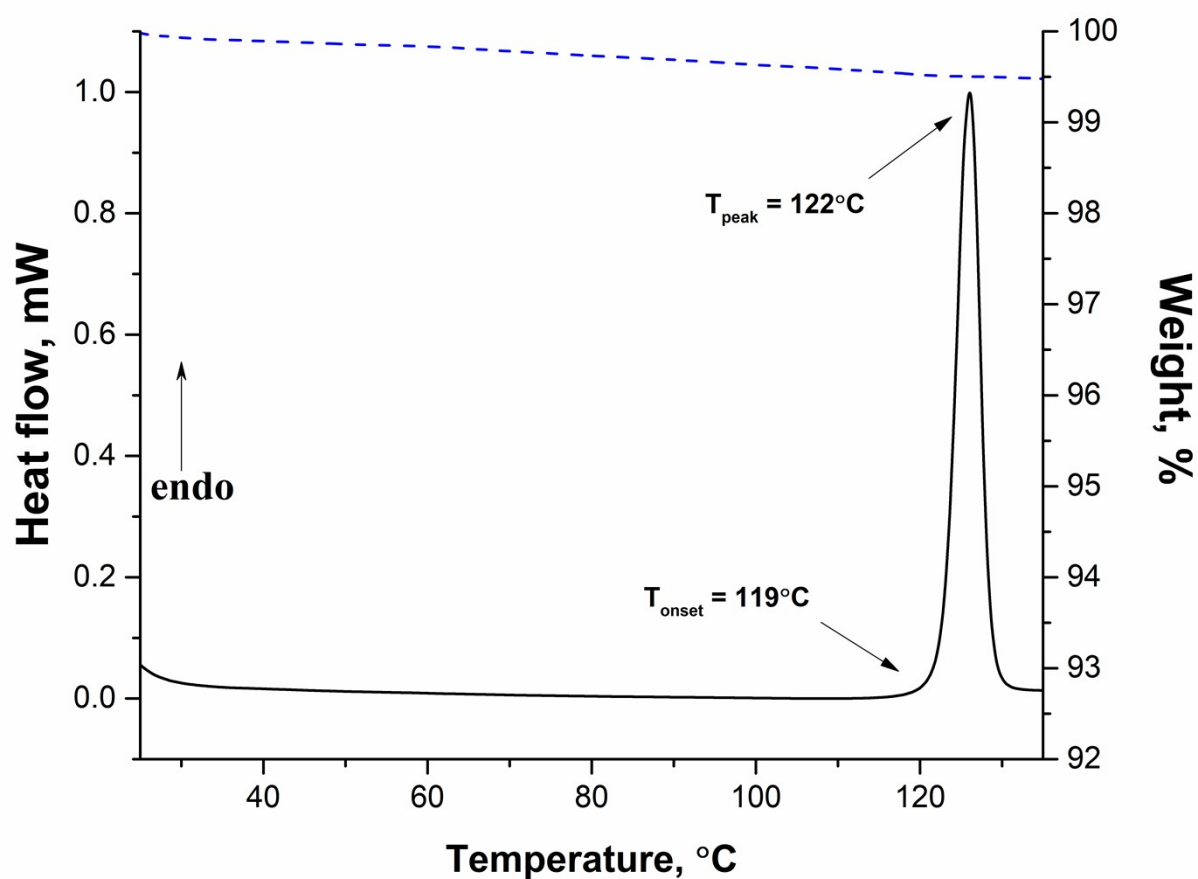

**Figure S1.** Results of DSC (solid line) and TG experiments (dashed line) for ISV<sub>CR</sub>

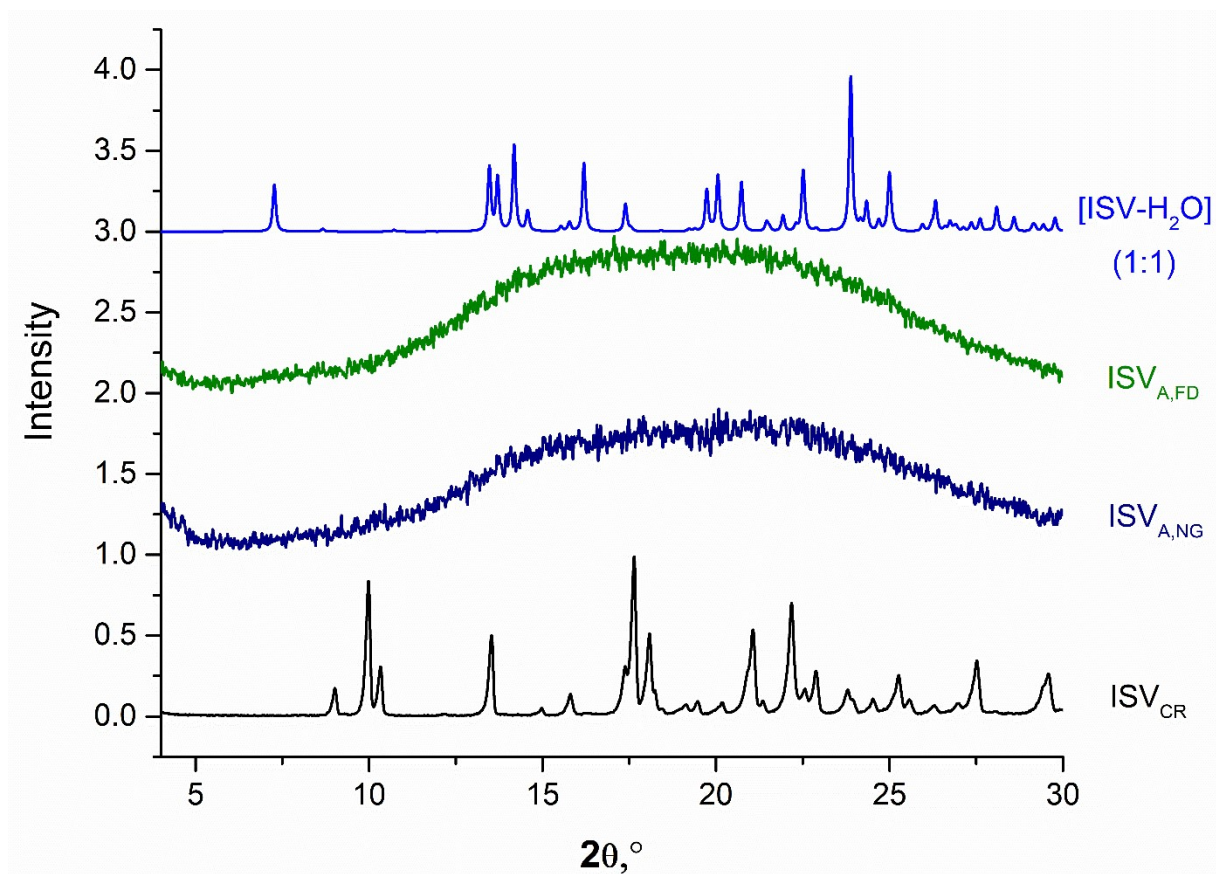

**Figure S2.** Experimental PXRD patterns of initial crystalline ISV (ISV<sub>CR</sub>), ISV monohydrate ([ISV-H<sub>2</sub>O]) and amorphous ISV obtained by neat grinding (ISV<sub>A,NG</sub>) and freeze-drying (ISV<sub>A,FD</sub>)



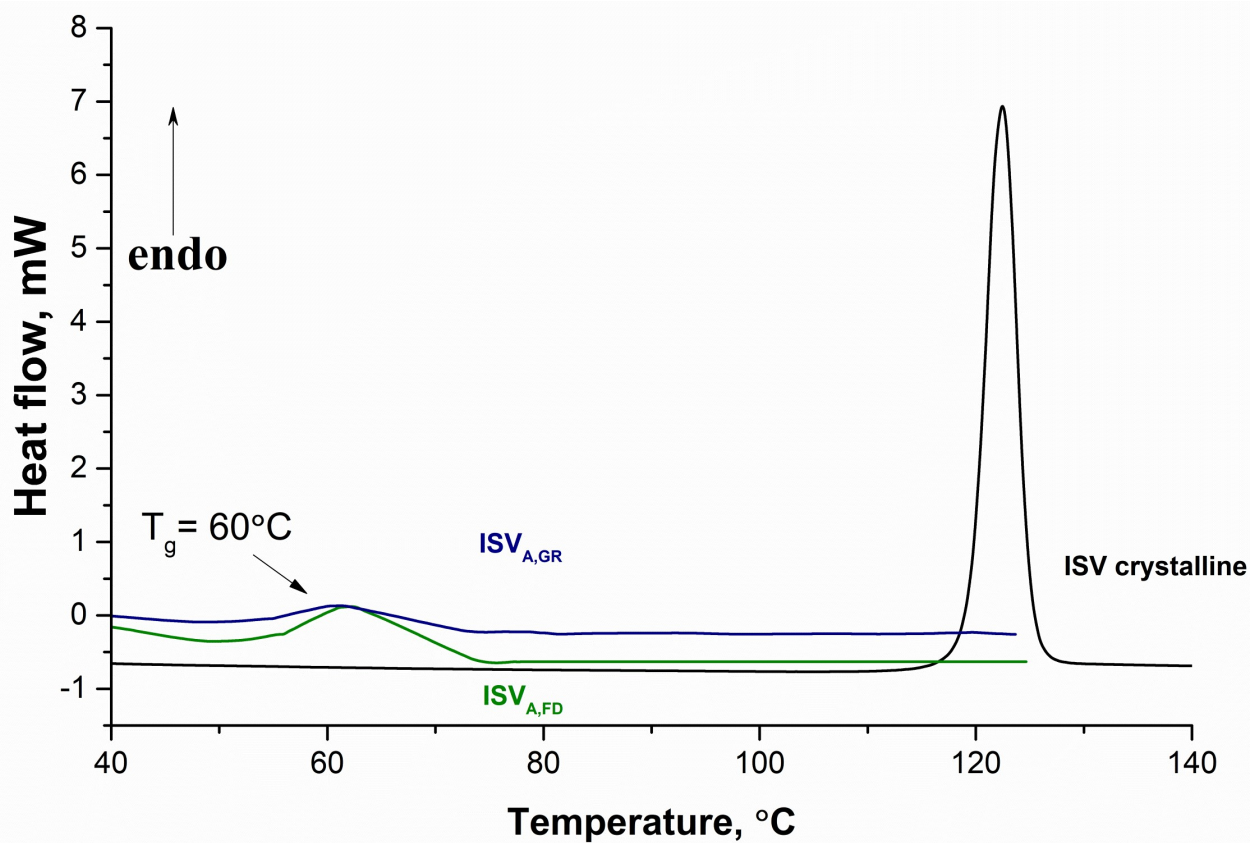

**Figure S3.** Overlay of DSC profiles of crystalline ISV and amorphous ISV obtained by neat grinding (ISV<sub>A,NG</sub>) and freeze-drying (ISV<sub>A,FD</sub>)

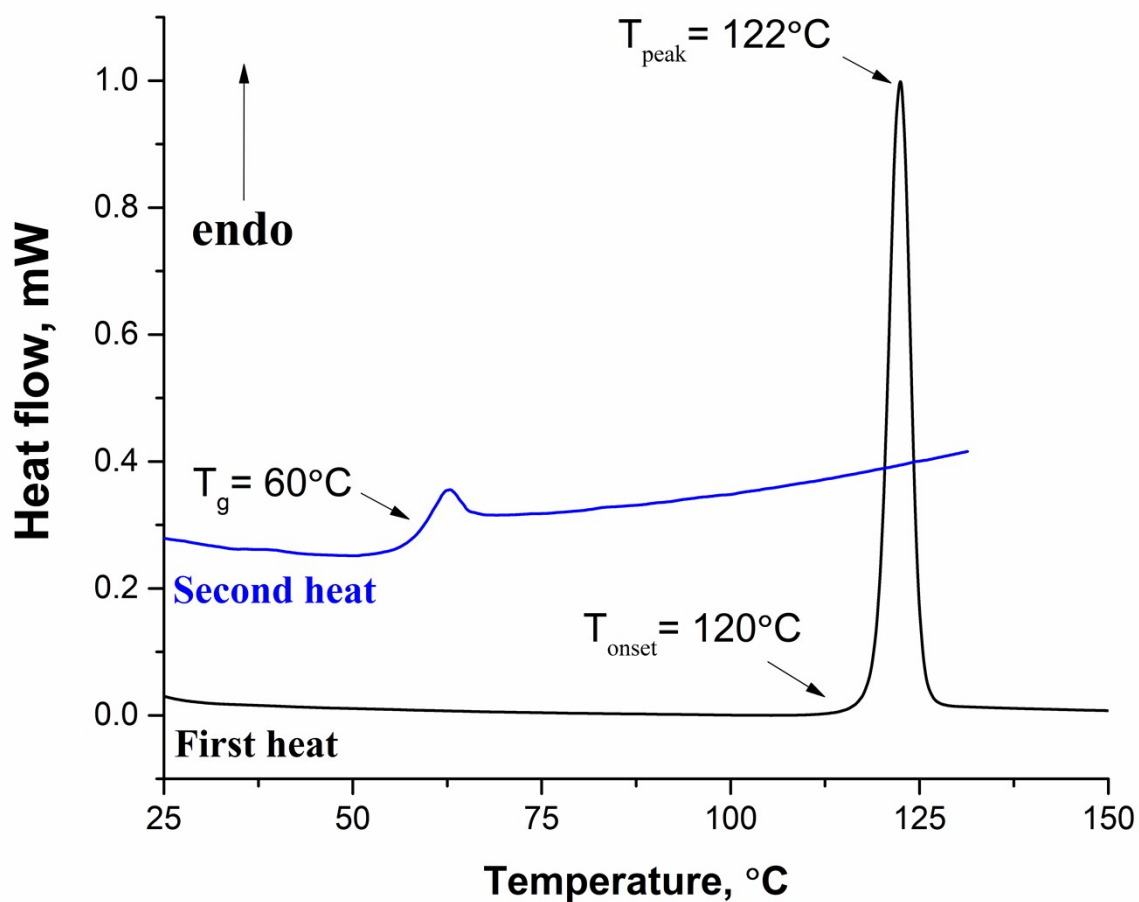

**Figure S4.** DSC profiles of crystalline ISV recorded during the cyclic heating experiment: initial sample (black line), sample after heating to 150 °C

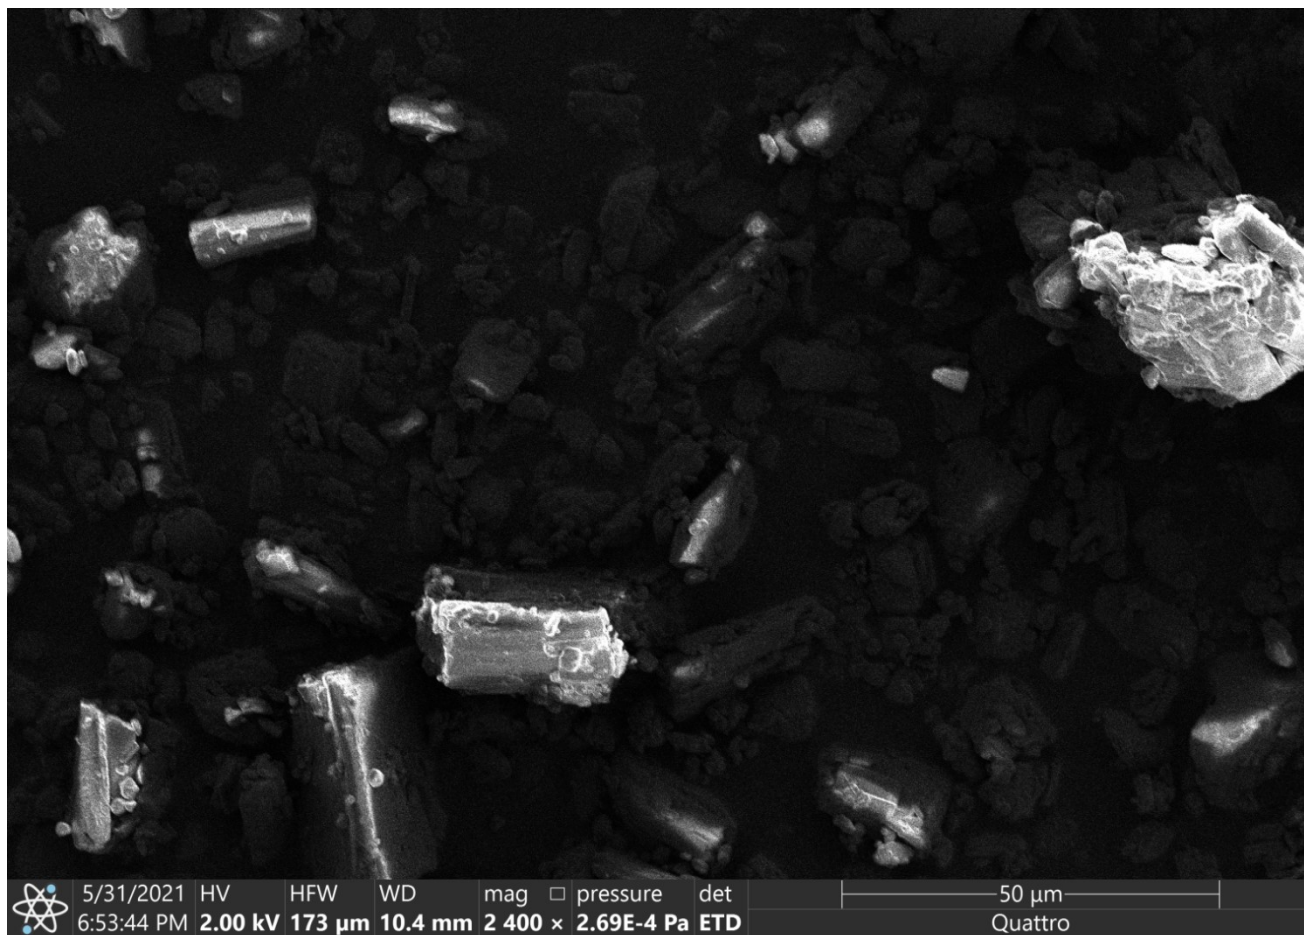

(a)

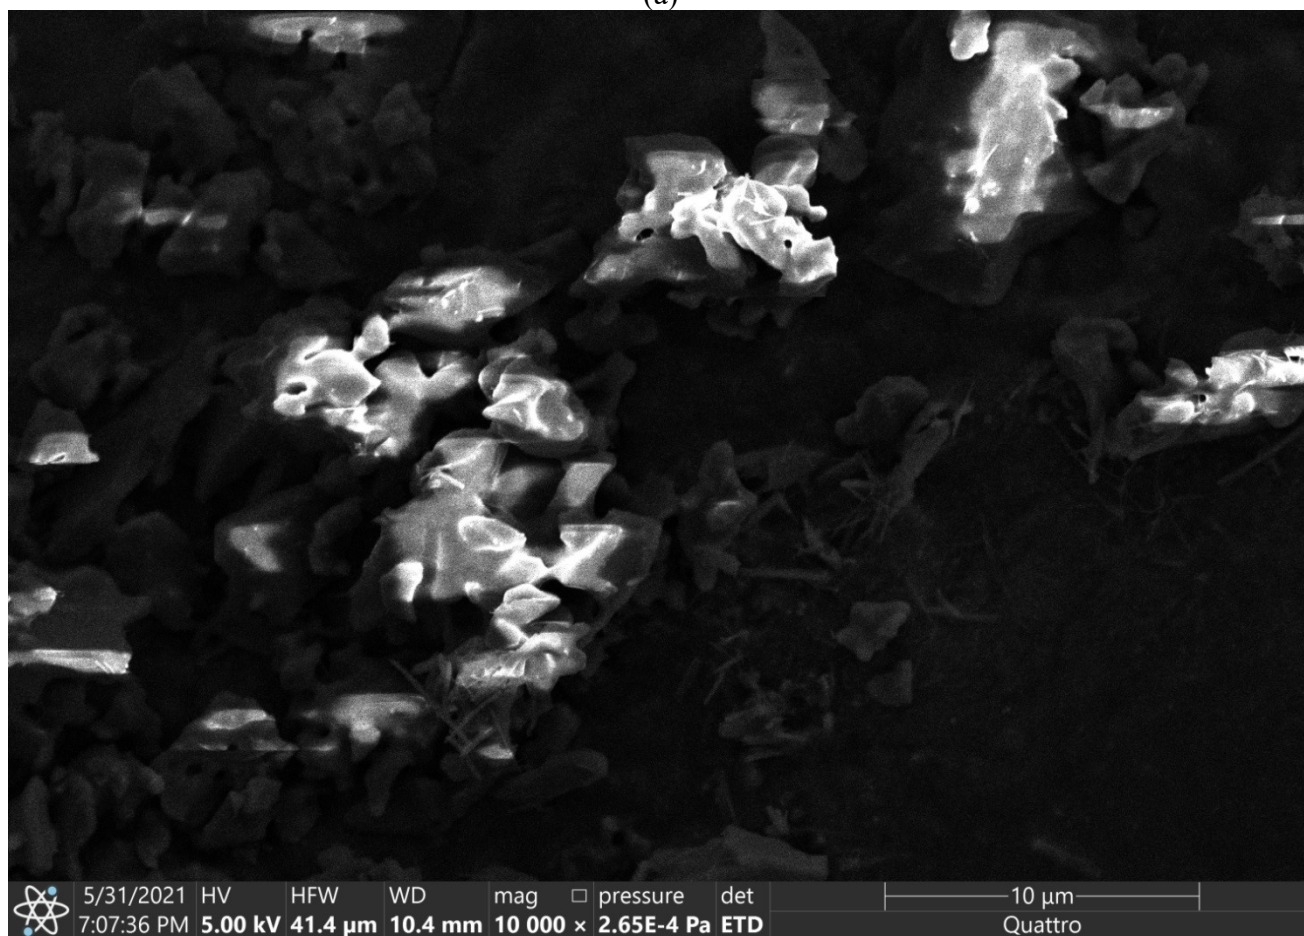

(b)



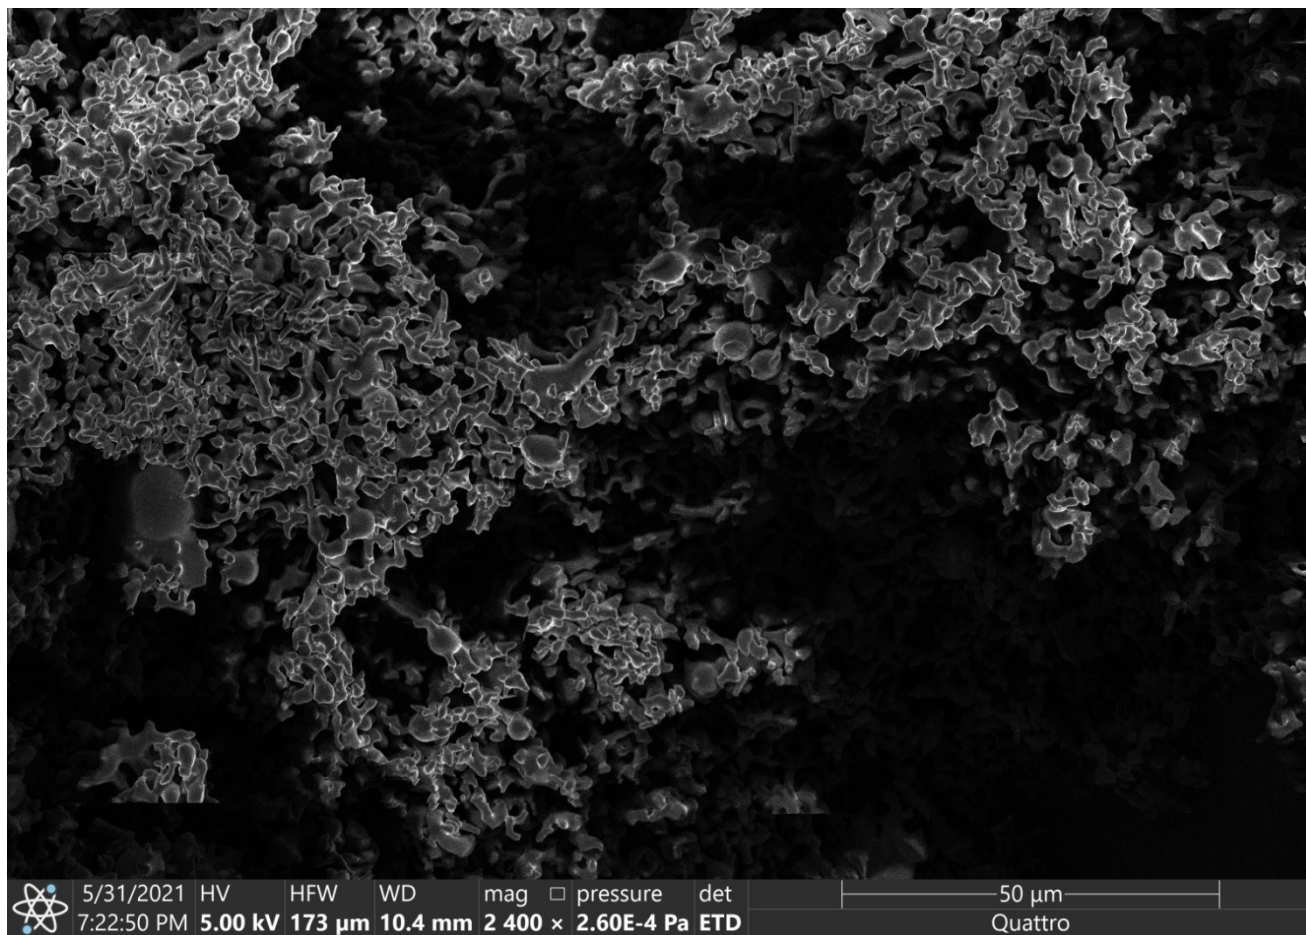

(c)

**Figure S5.** SEM images of initial  $ISV_{CR}$  (a), amorphous ISV obtained by neat grinding ( $ISV_{A,NG}$ ) (b) and amorphous ISV obtained by freeze-drying ( $ISV_{A,FD}$ ) (c)

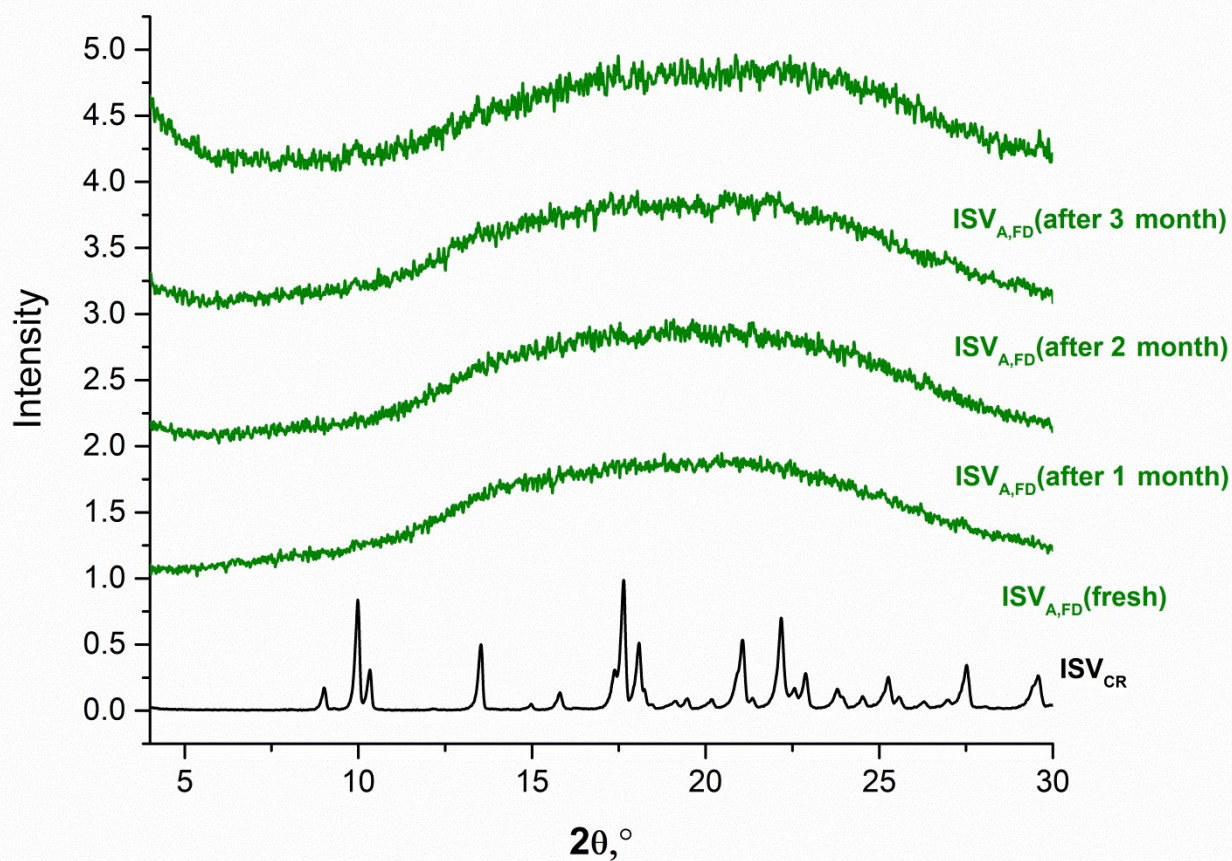

(a)



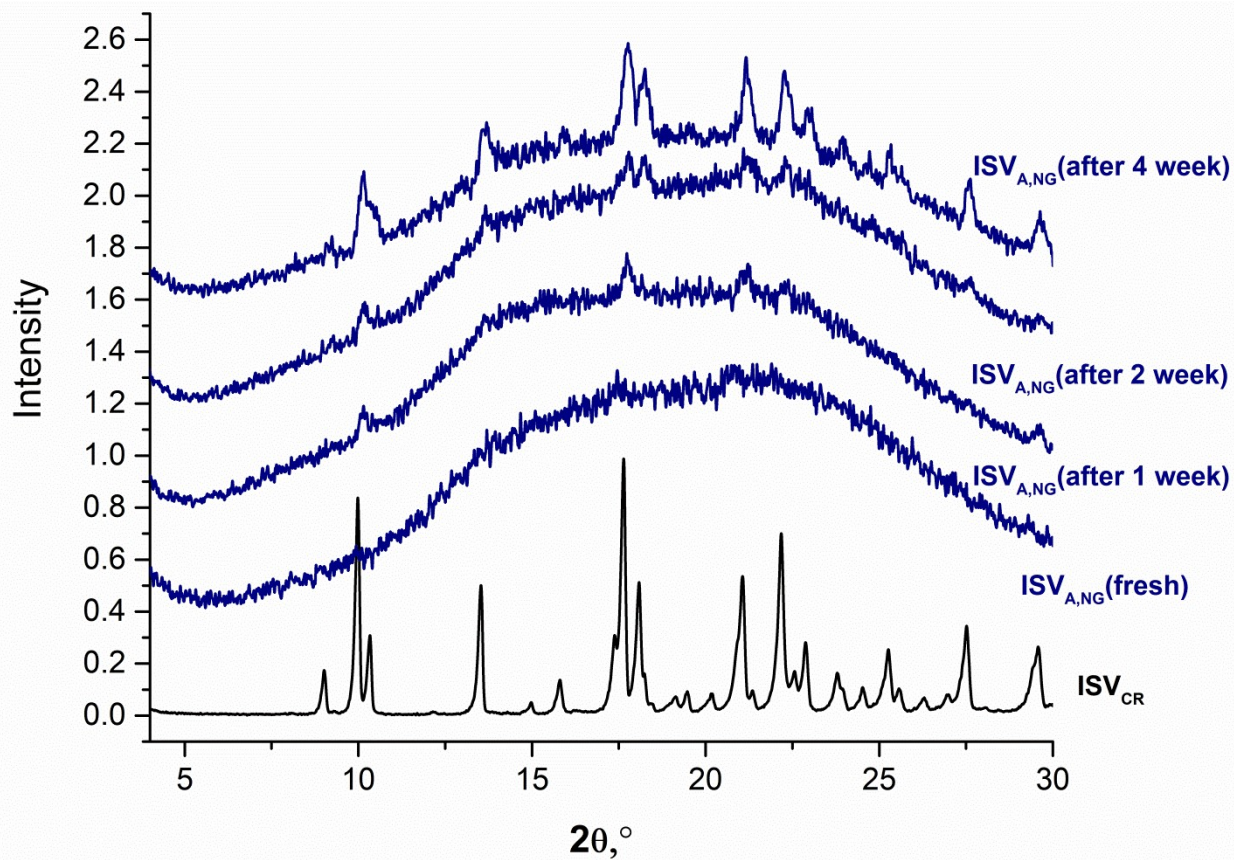

(b)

**Figure S6.** PXRD patterns of  $\text{ISV}_{\text{A,FD}}$  (A) and  $\text{ISV}_{\text{A,NG}}$  (B) after storage for different times at 0% RH at room temperature.

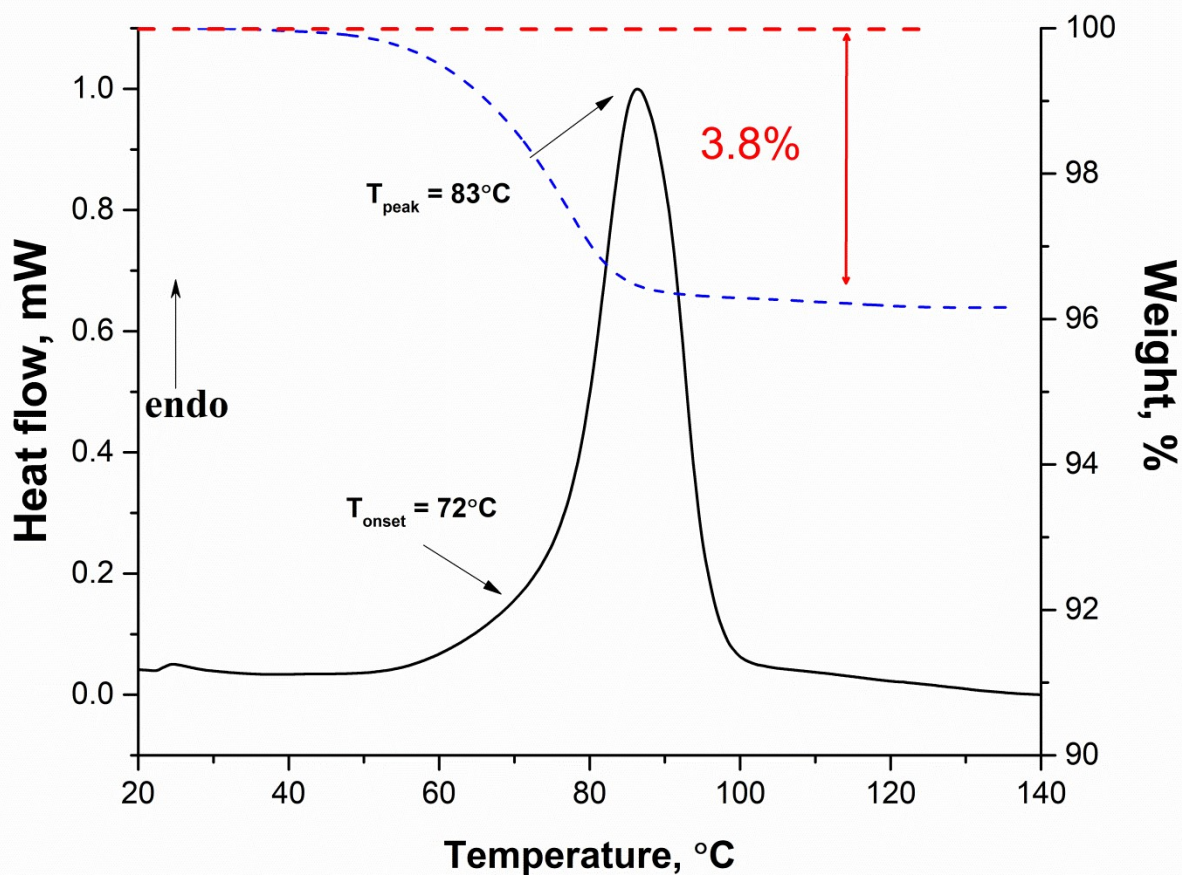

**Figure S7.** The results of DSC (solid line) and TG (dashed line) experiments for  $[\text{ISV-H}_2\text{O}]$ .

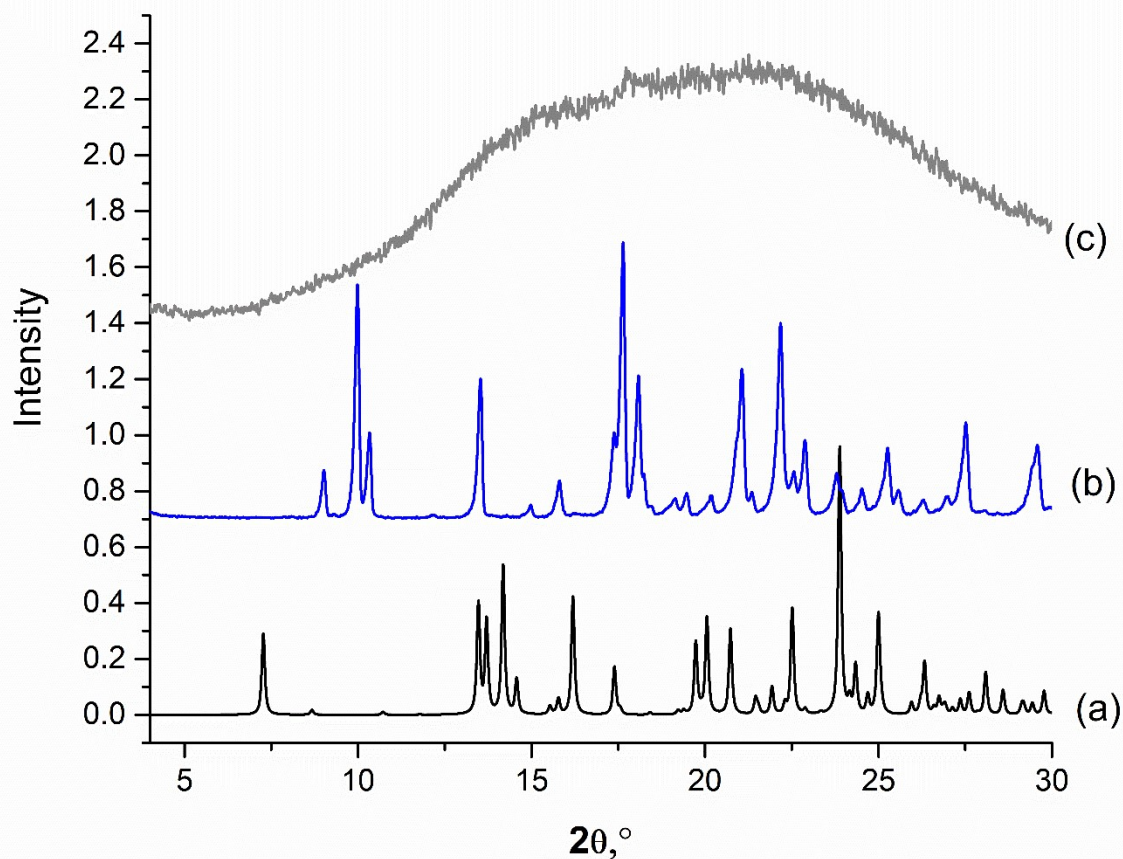

**Figure S8.** Powder XRD patterns of initial ISV (a), [ISV-H<sub>2</sub>O] (b), and [ISV-H<sub>2</sub>O] after heating above the dehydration temperature (c)

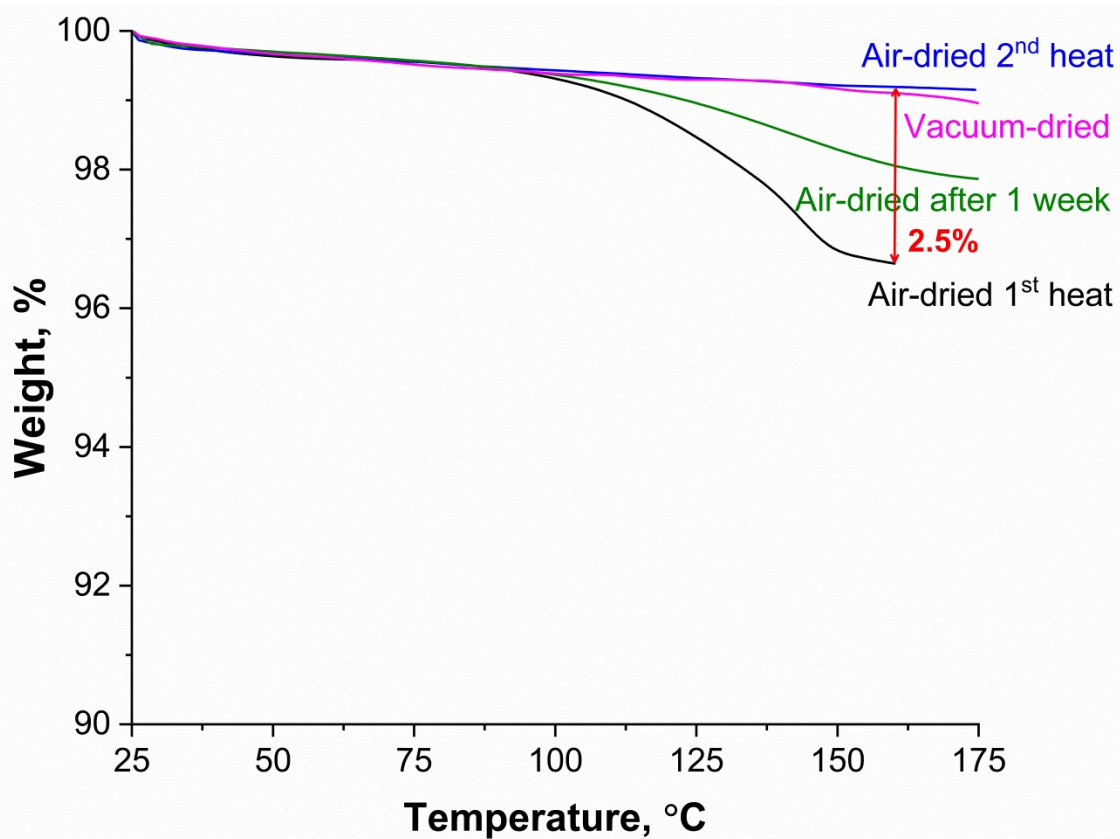

**Figure S9.** TG results for [ISV-TS-ACN] sample: initial sample (black line), after heating to 160 °C (blue line), stored for a week (green line); the sample dried under reduced pressure to constant mass (magenta line).



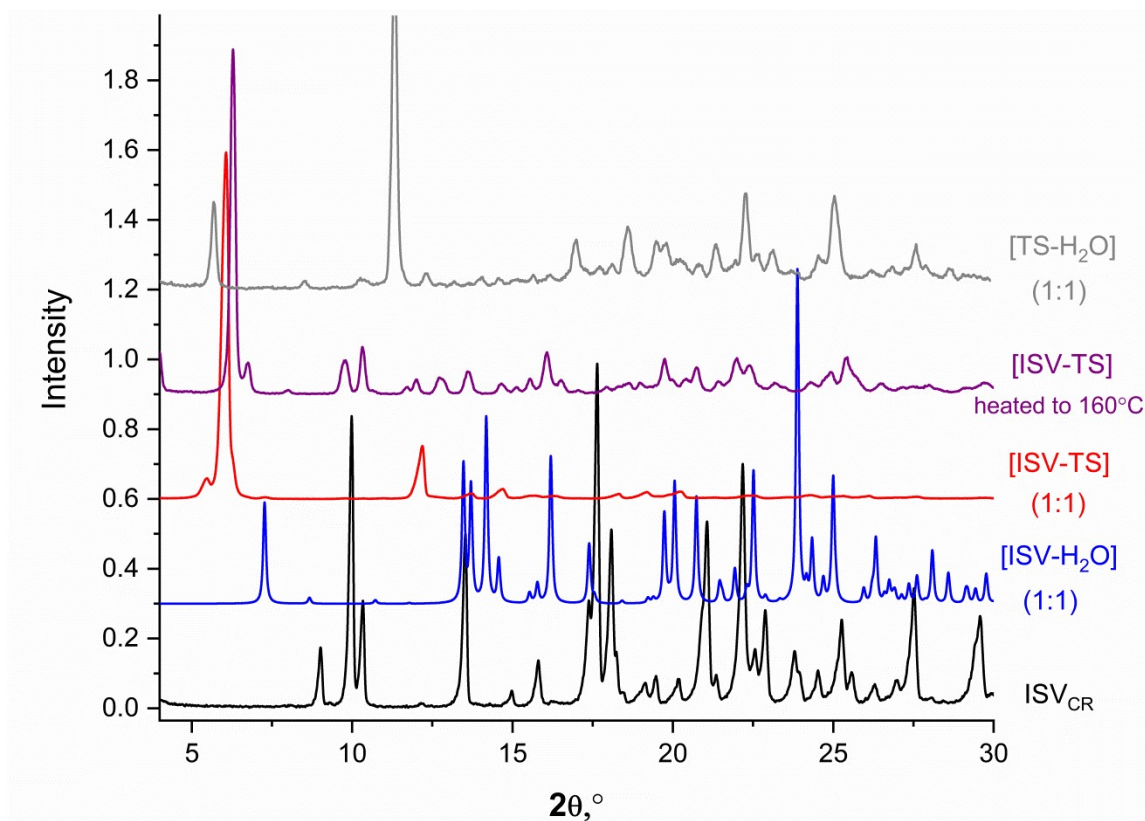

**Figure S10.** Powder XRD patterns of parent ISV, [ISV-H<sub>2</sub>O] (1:1), [TS-H<sub>2</sub>O] (1:1), unsolvated [ISV-TS] sample and high-temperature form of [ISV-TS] obtained via heating the salt up to 160°C.

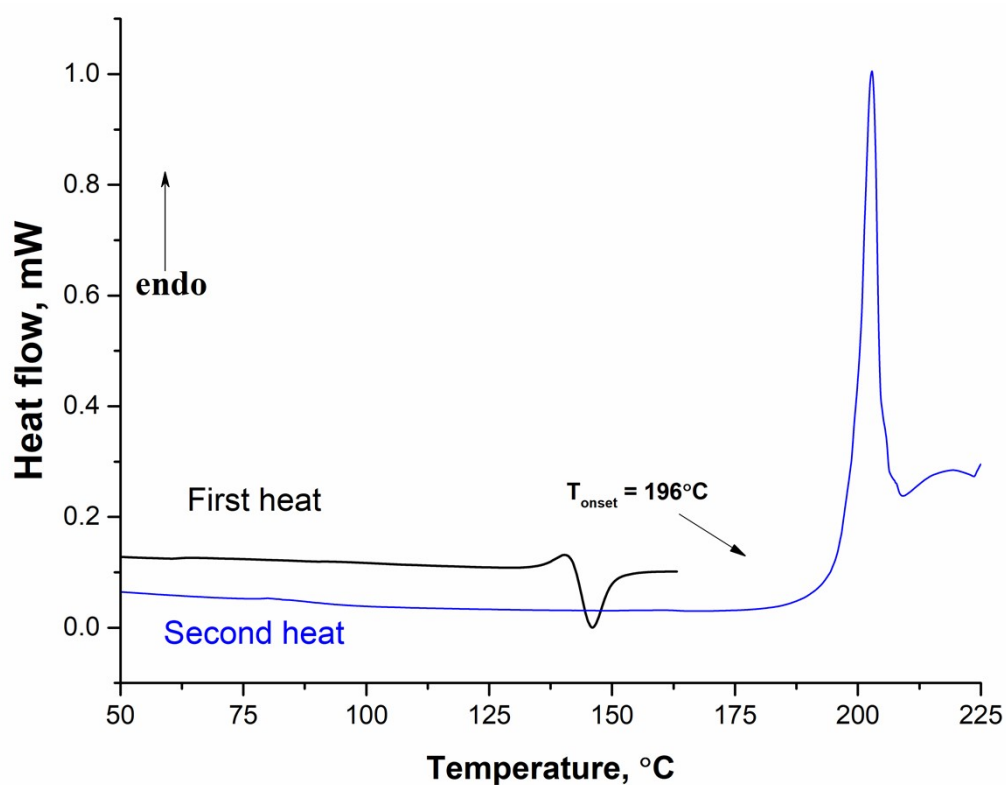

**Figure S11.** DSC results for the [ISV-TS] sample: initial sample (black line), after heating to 160 °C (blue line).

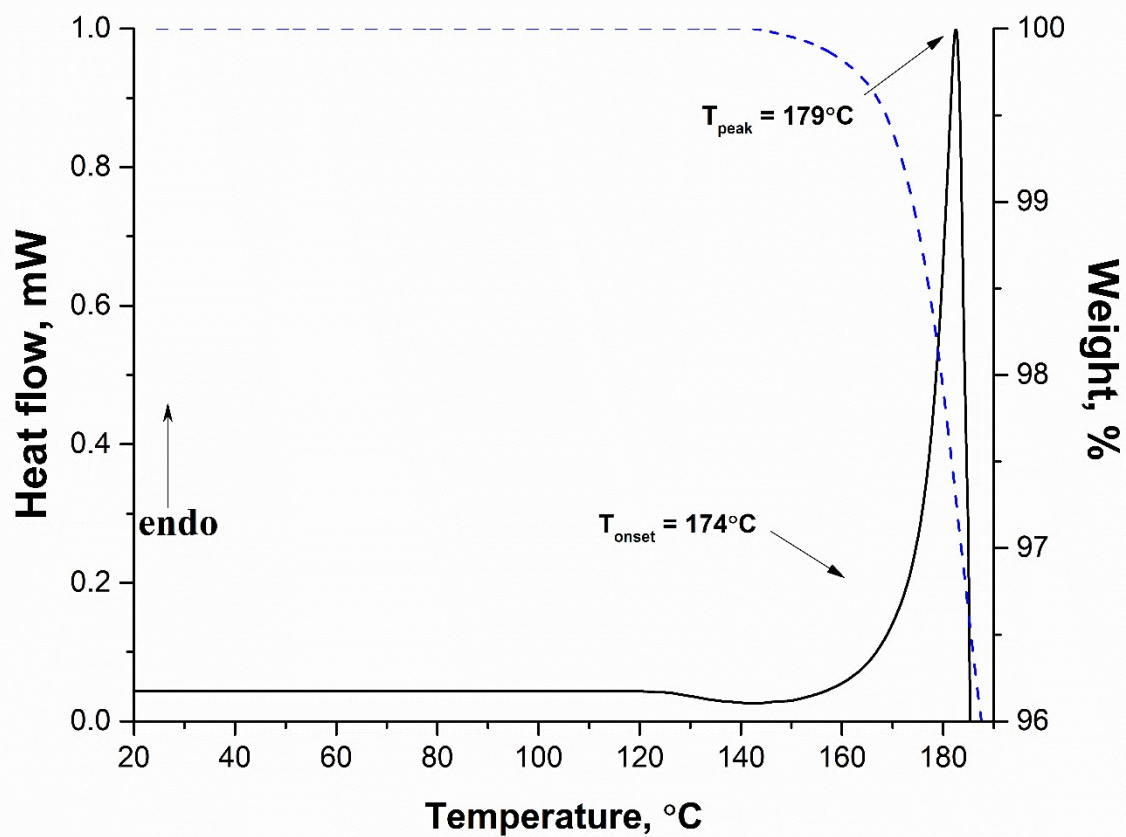

**Figure S12.** The results of DSC (solid line) and TG (dashed line) experiments for [ISV-P].

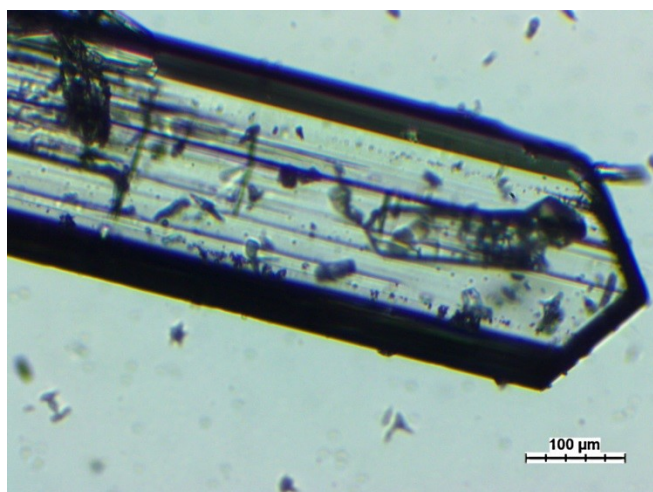

26°C (initial temperature)

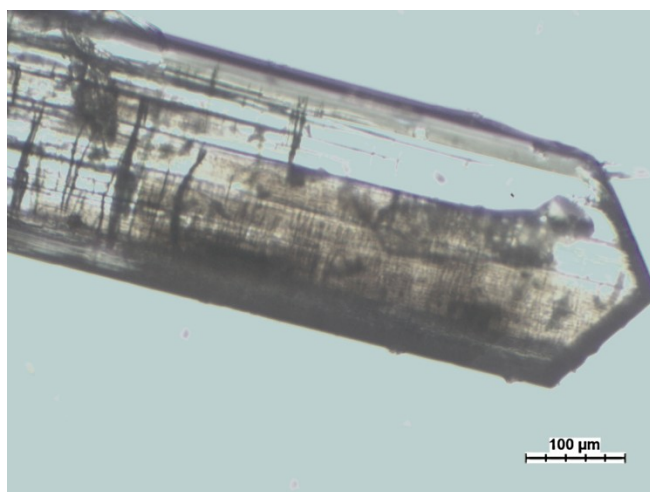

135°C

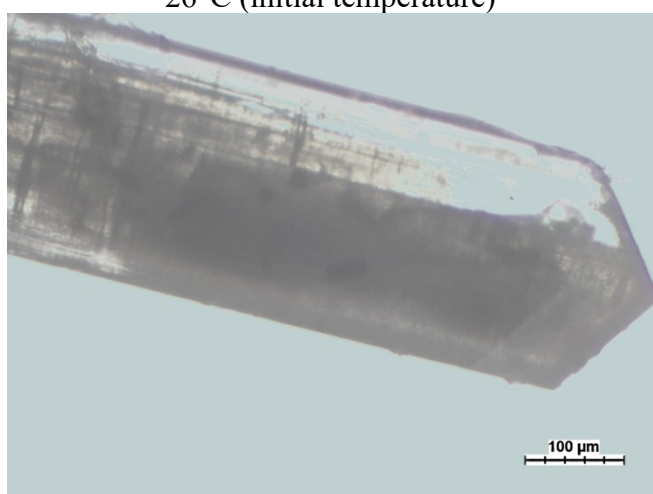

140°C

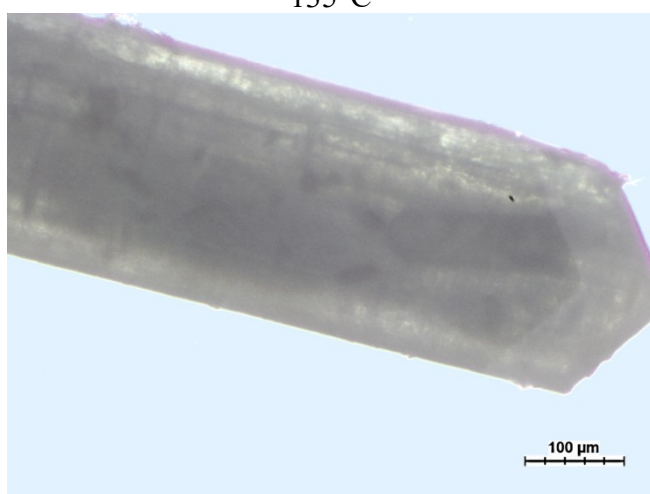

180°C

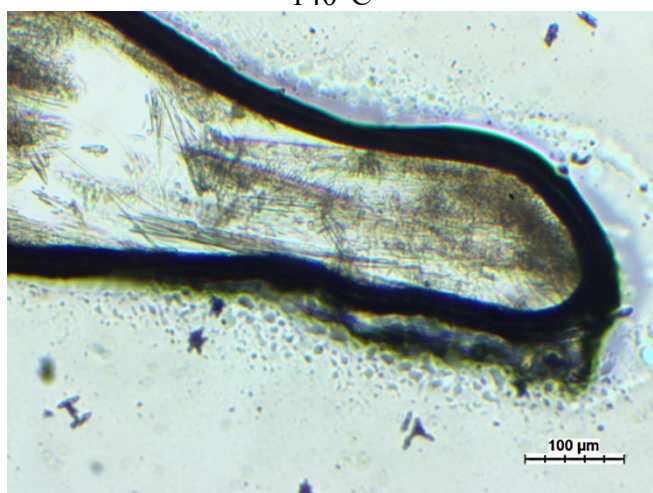

196°C

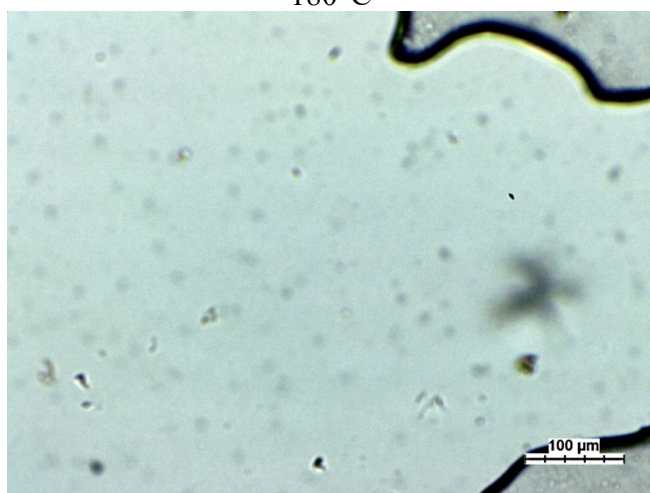

200°C

**Figure S13.** Hot stage microscopy images of the [ISV-TS-ACN] single crystal taken at various temperatures during the sample heating.



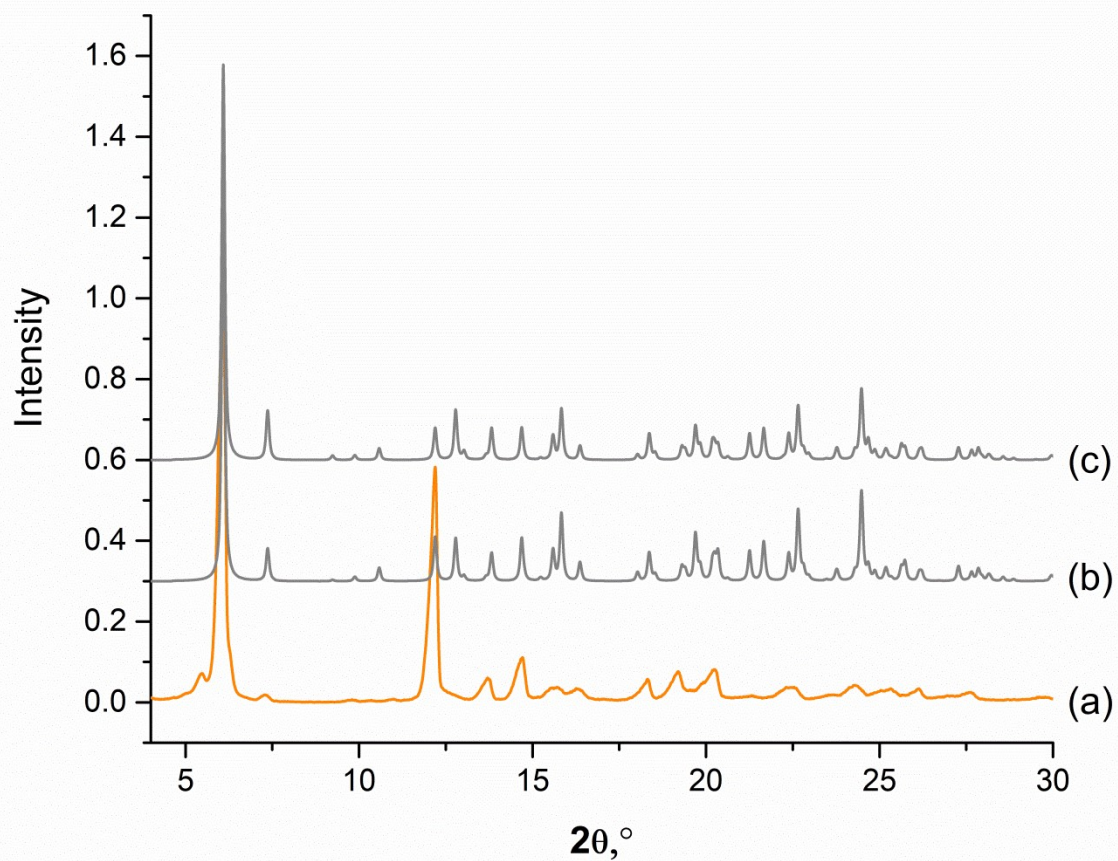

**Figure S14.** Overlay of experimental (a) and simulated XRD patterns of [ISV-TS] (1:1) obtained from the crystal structure (b) without and after structure relaxation (c)

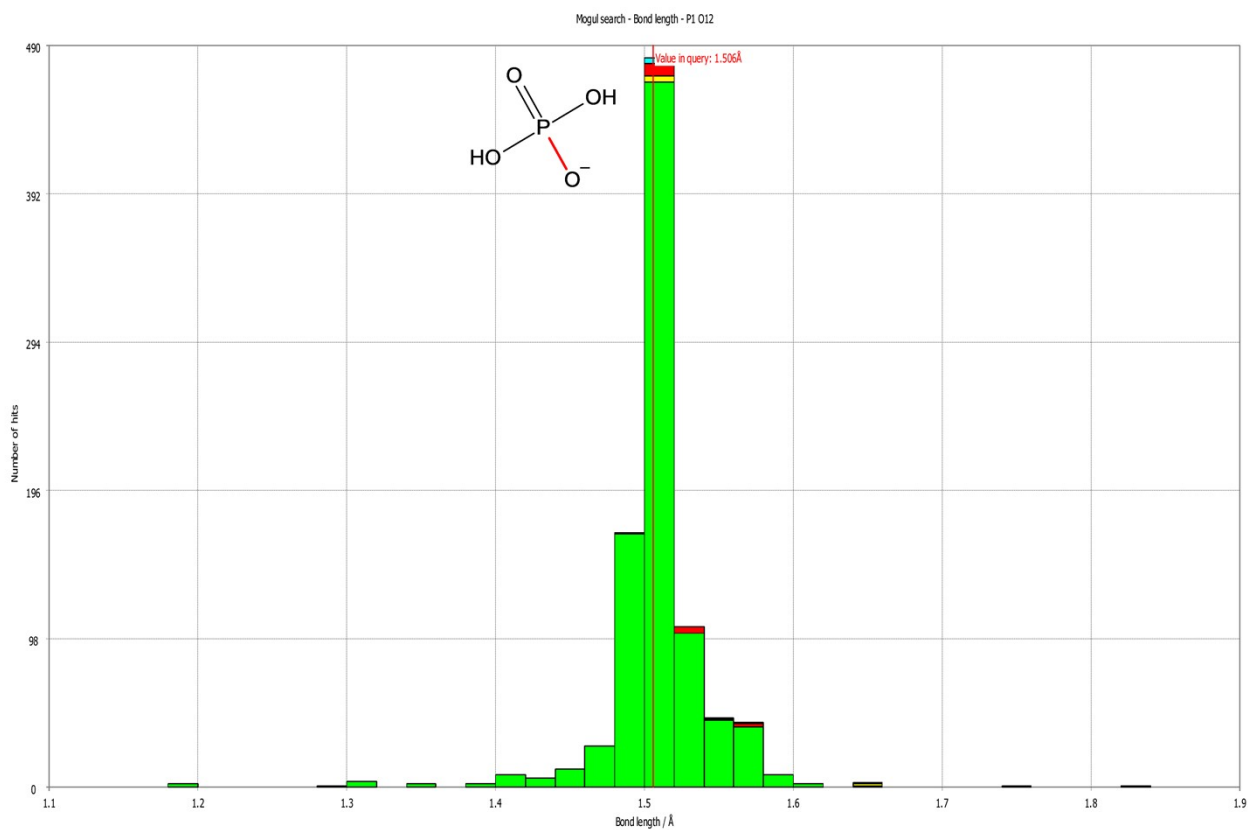

**Figure S15.** Results of the Mogul analysis for the P<sup>V</sup>-O<sup>-</sup> bond length in the CSD

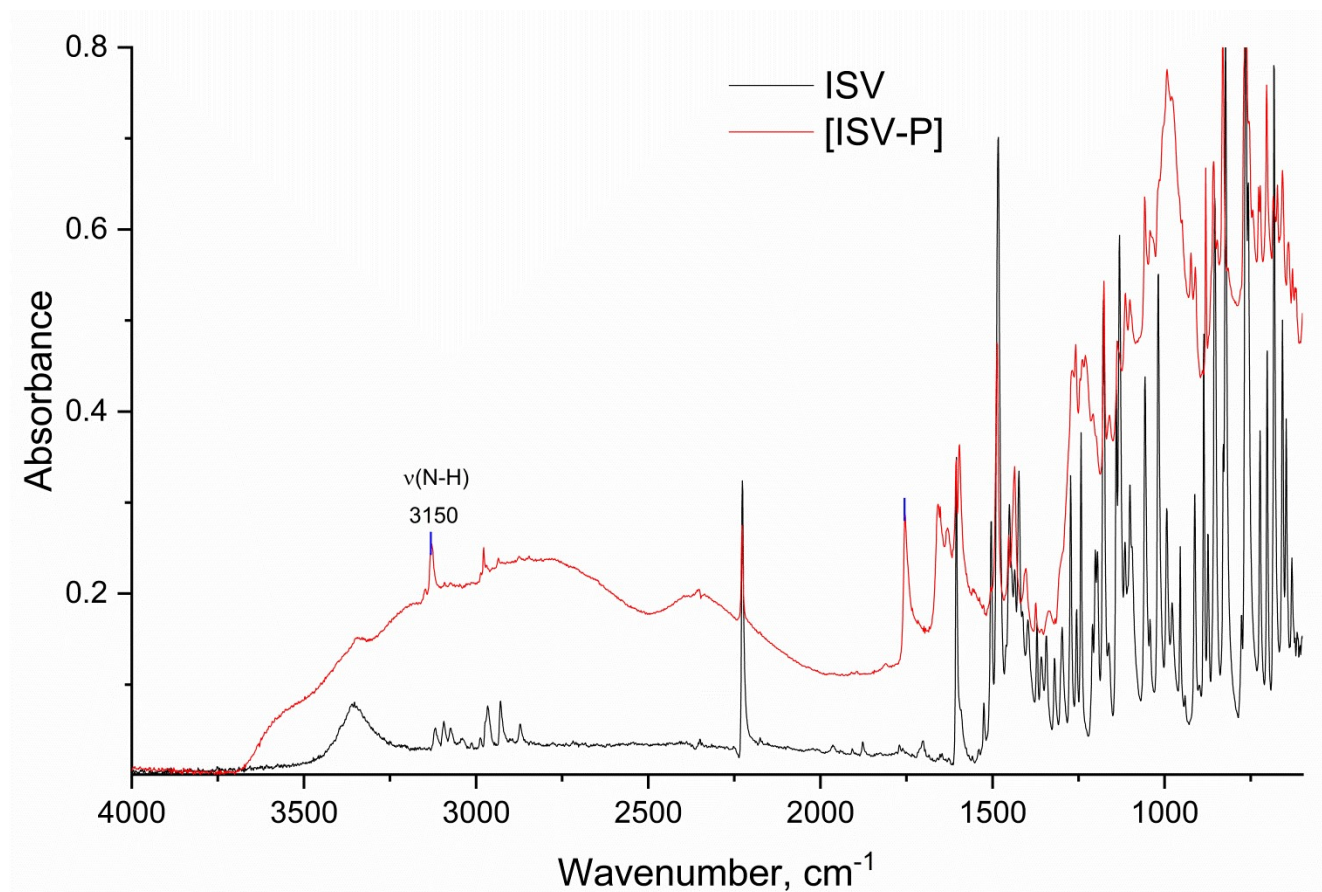

**Figure S16.** FTIR spectra of initial ISV<sub>CR</sub> (black line) and [ISV-P] (red line). The highlighted peak corresponds to stretching of the N<sup>+</sup>-H bond in the ISV cation.

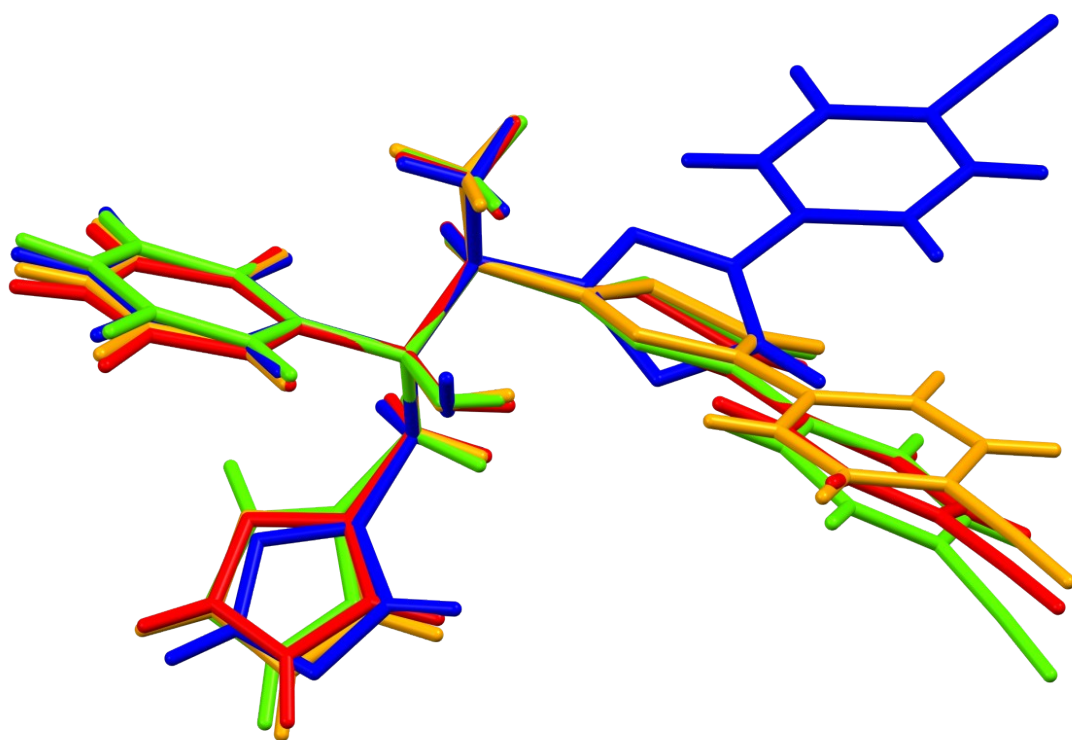

**Figure S17.** Overlay of the conformations of ISV molecules extracted from the crystal structures of ISV<sub>CR</sub> (green), [ISV-H<sub>2</sub>O] (blue), [ISV-TS] (red) and [ISV-P] (orange).

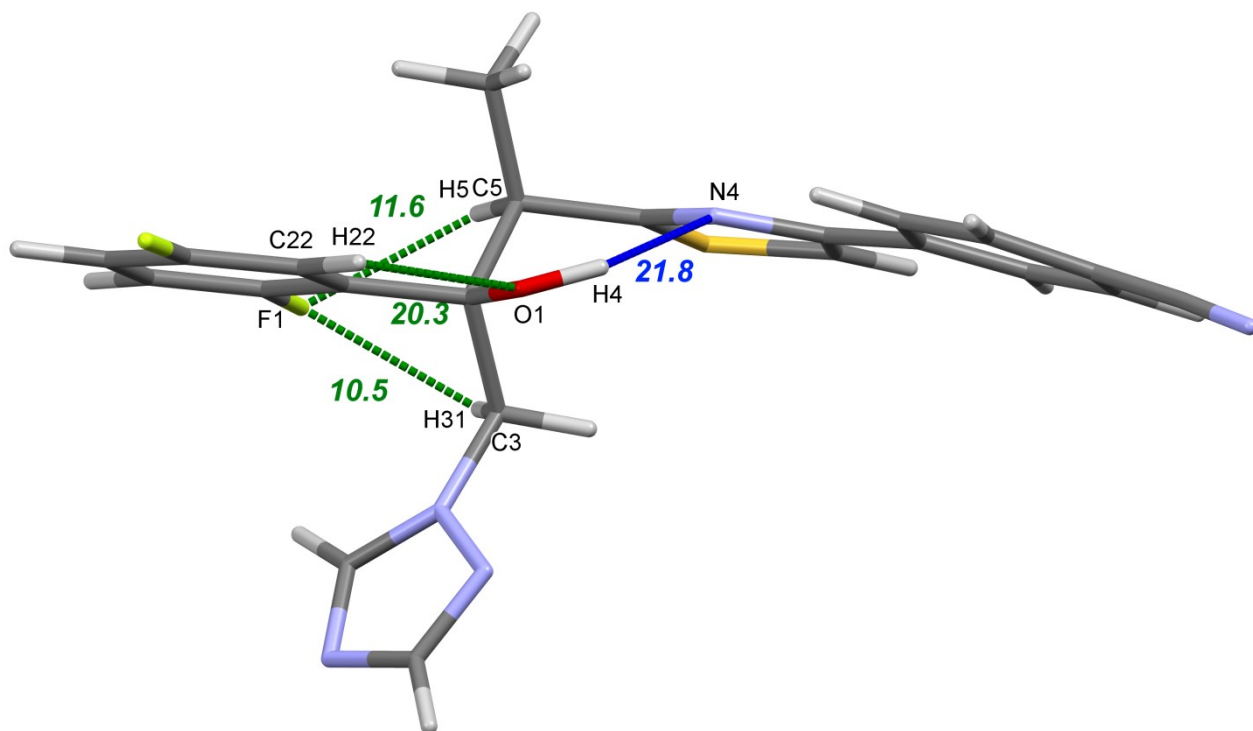

A

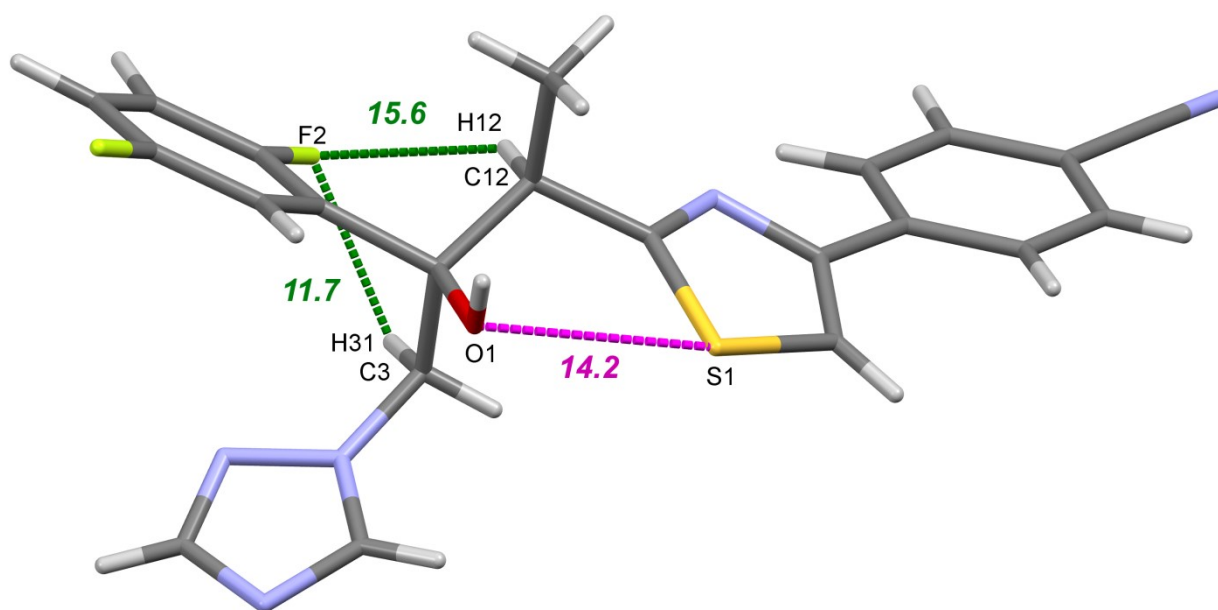

B

**Figure S18.** The images of “closed” (A) and “open” (B) conformations of ISV stabilized by intramolecular O-H $\cdots$ N bonds (blue), C-H $\cdots$ X hydrogen bonds (green) and chalcogen bonds (magenta). The numbers indicate energies of non-covalent interactions estimated using eq. (3). The atom numeration is consistent with that in crystals of ISV and [ISV-H<sub>2</sub>O] (1:1).



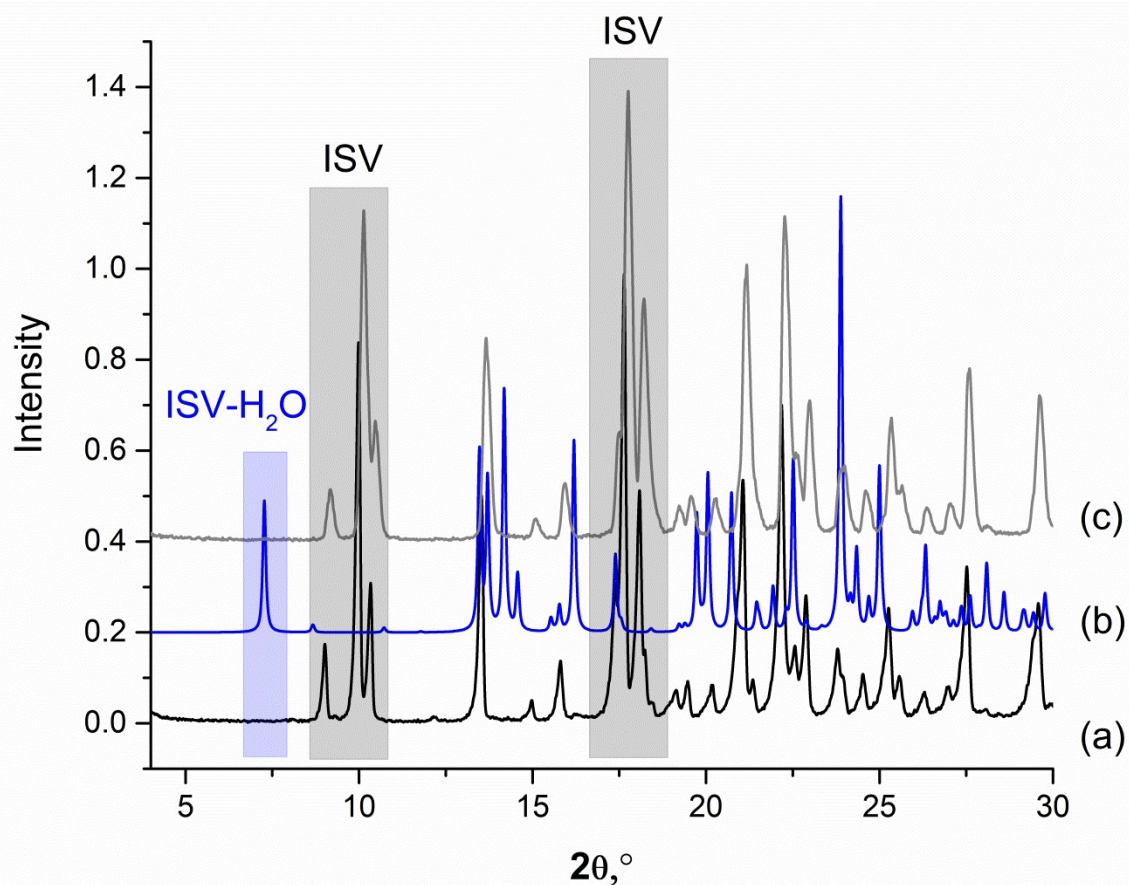

**Figure S19.** Experimental PXRD patterns of ISV<sub>CR</sub> (a), [ISV-H<sub>2</sub>O] (1:1) (b) and the solid phase after 48h dissolution experiments of ISV<sub>CR</sub> in pH 7.4 buffer media at 37°C (c)

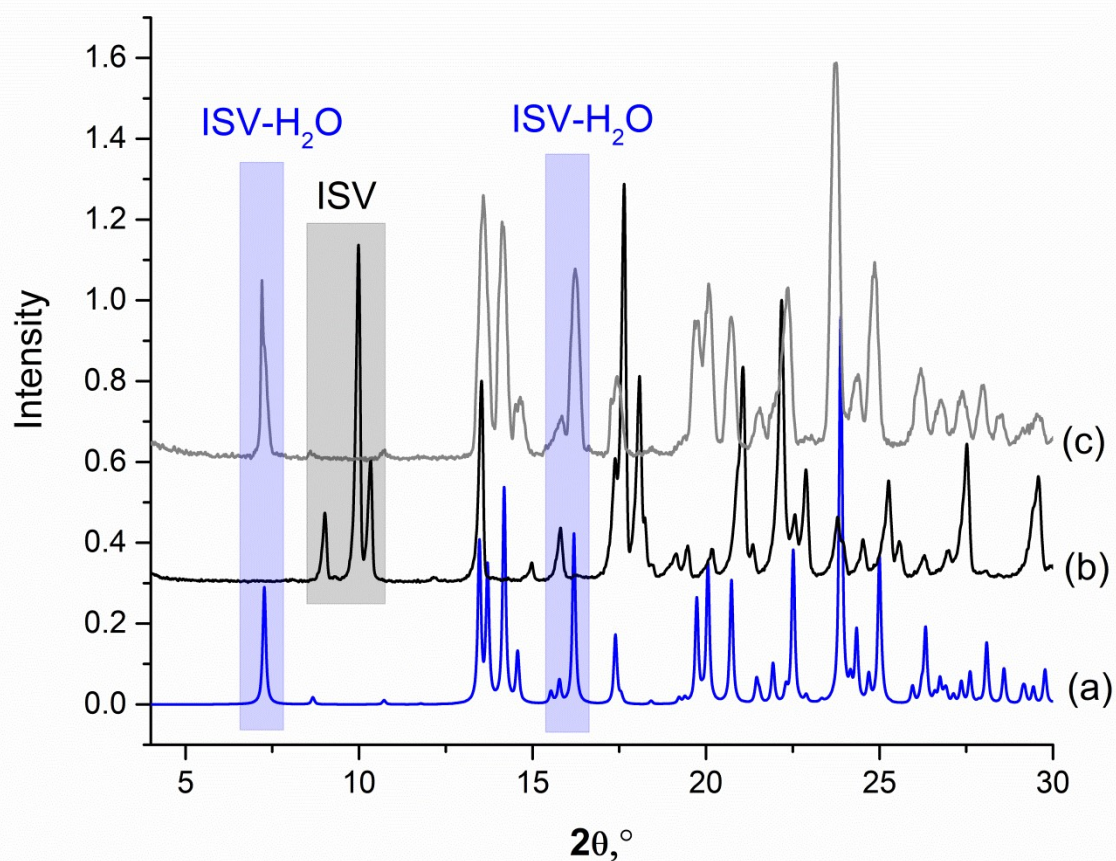

**Figure S20.** Experimental PXRD patterns of [ISV-H<sub>2</sub>O] (1:1) (a), ISV<sub>CR</sub> (b) and the solid phase after 48h dissolution experiments of [ISV-H<sub>2</sub>O] (1:1) in pH 7.4 buffer media at 37°C (c)

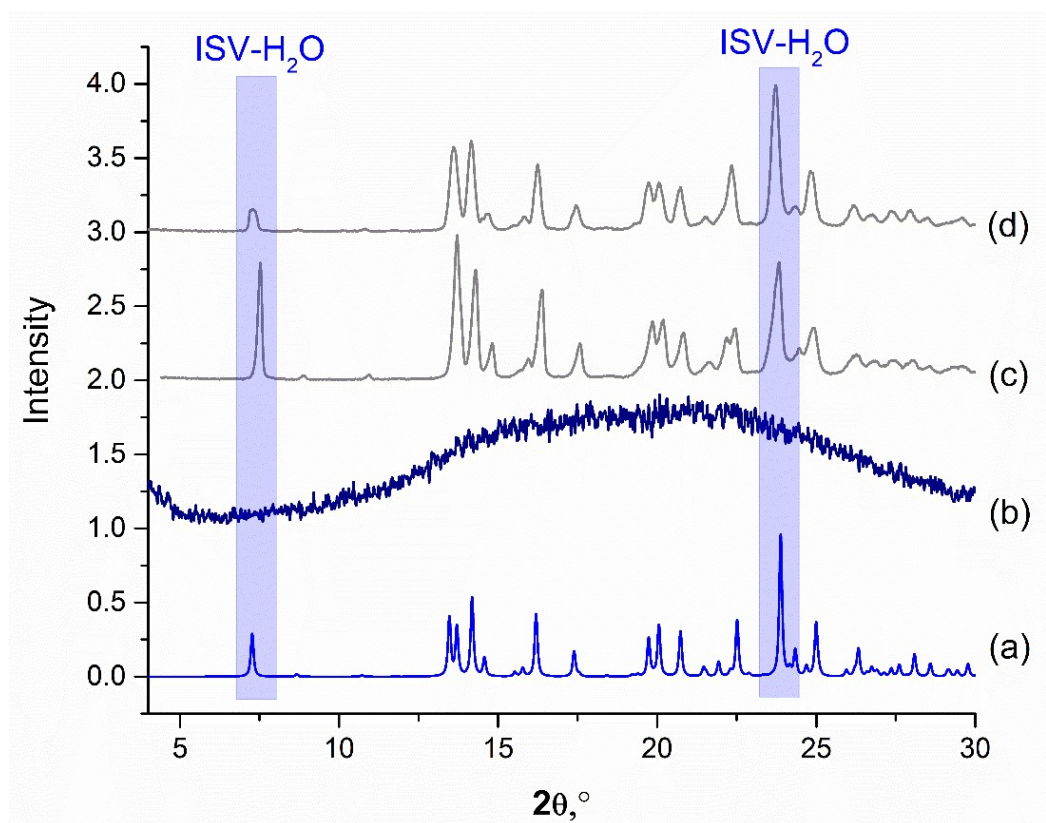

**Figure S21.** Experimental PXRD patterns of [ISV-H<sub>2</sub>O] (1:1) (a), ISV<sub>A,NG</sub> (b) and solid phases after 24h dissolution experiments of ISV<sub>A,NG</sub> in pH 1.2 (c) and pH 7.4 (d) buffer media

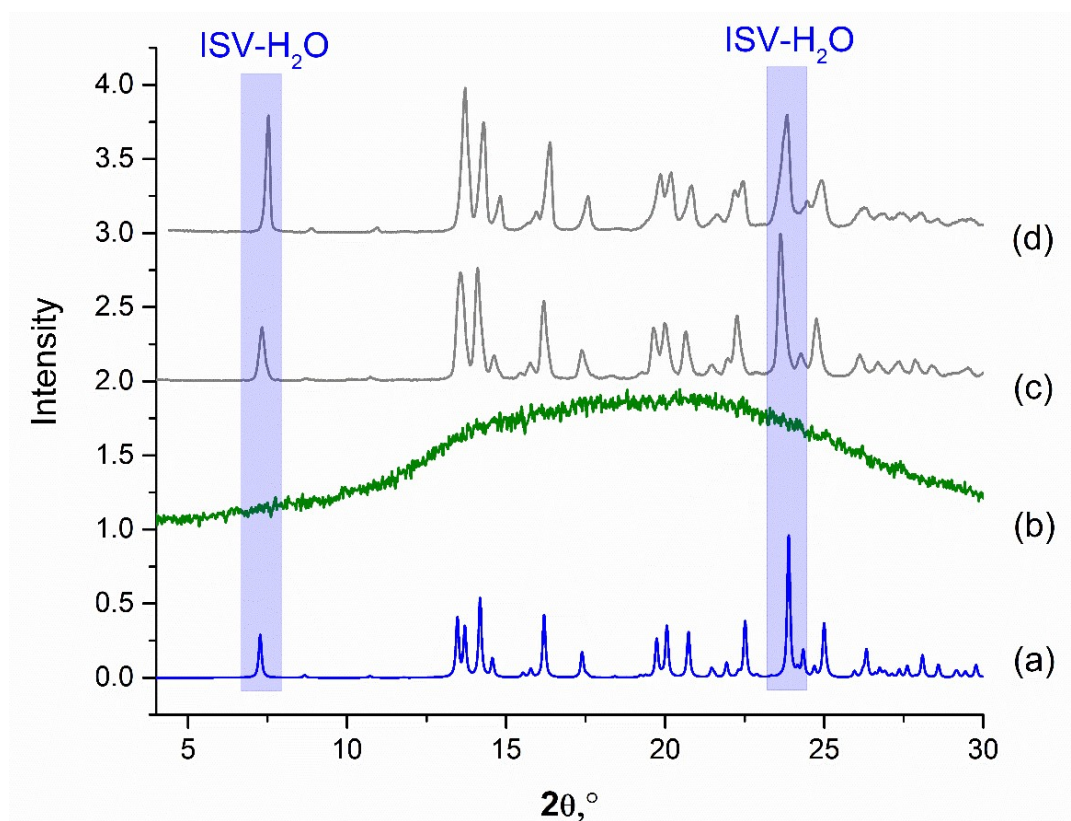

**Figure S22.** Experimental PXRD patterns of [ISV-H<sub>2</sub>O] (1:1) (a), ISV<sub>A,FD</sub> (b) and solid phases after 24h dissolution experiments of ISV<sub>A,FD</sub> in pH 1.2 (c) and pH 7.4 (d) buffer media



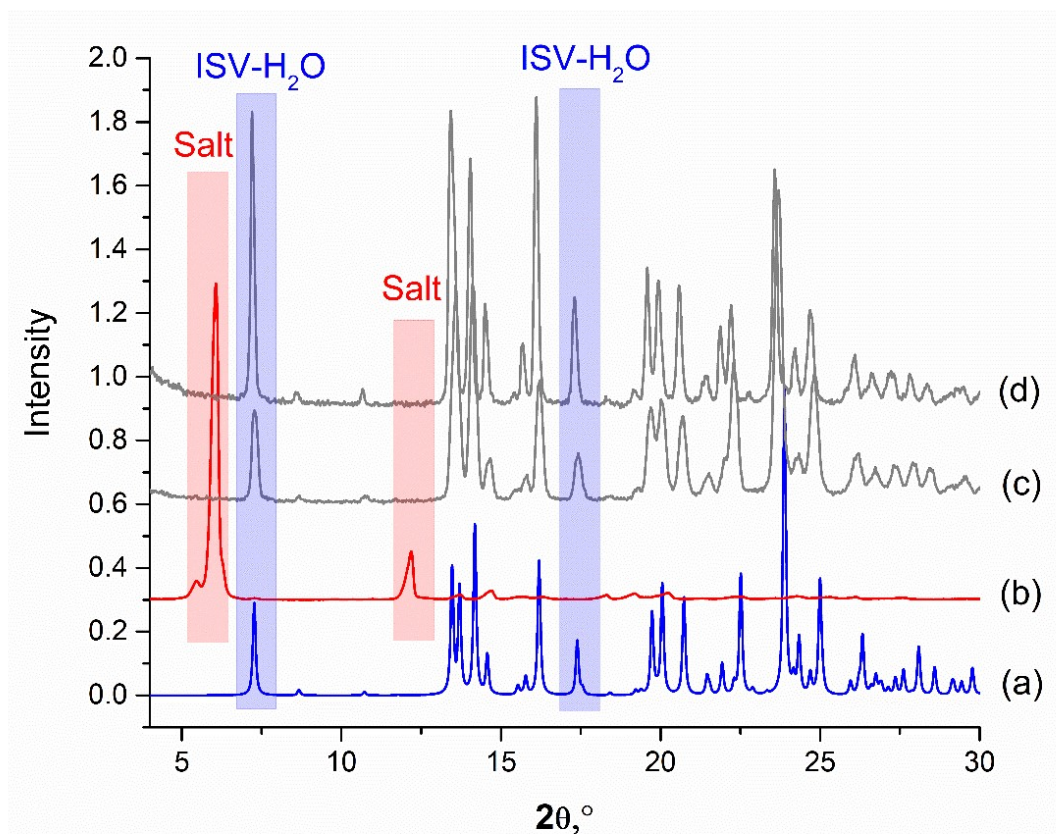

**Figure S23.** Experimental PXRD patterns of [ISV-H<sub>2</sub>O] (1:1) (a), [ISV-TS] (1:1) (b) and solid phases after 24h dissolution experiments of [ISV-TS] (1:1) in pH 1.2 (c) and pH 7.4 (d) buffer media

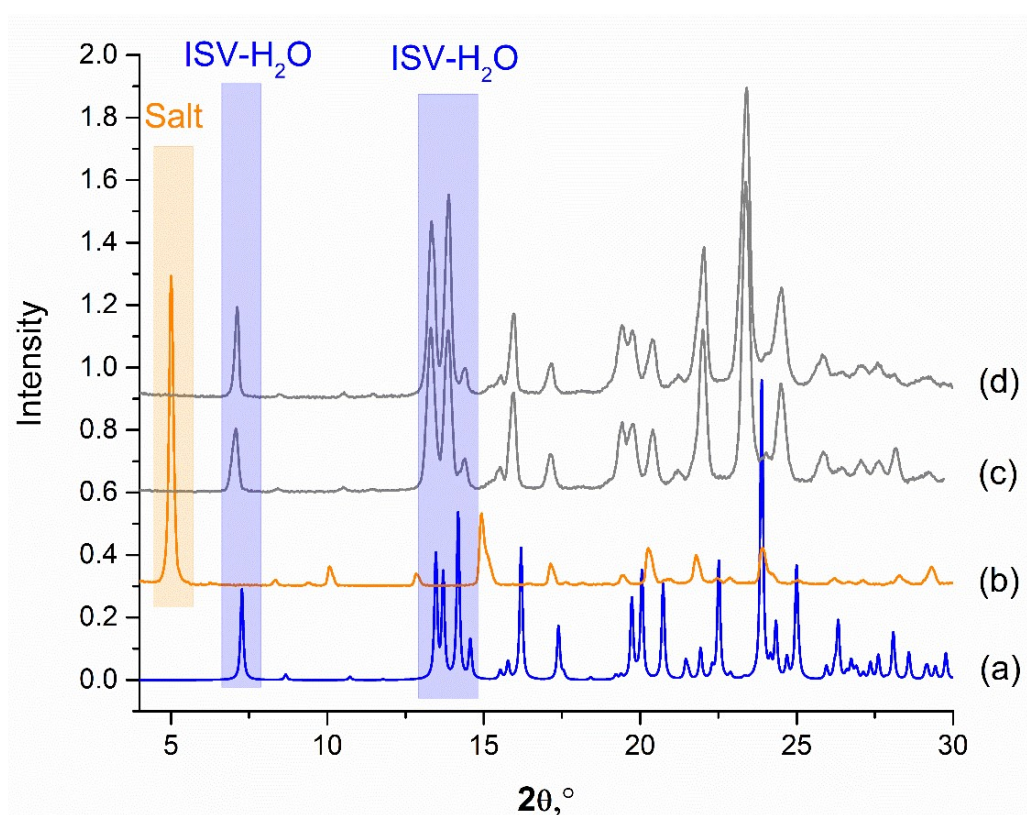

**Figure S24.** Experimental PXRD patterns of [ISV-H<sub>2</sub>O] (1:1) (a), [ISV-P] (1:1) (b) and solid phases after 24h dissolution experiments of [ISV-P] (1:1) in pH 1.2 (c) and pH 7.4 (d) buffer media

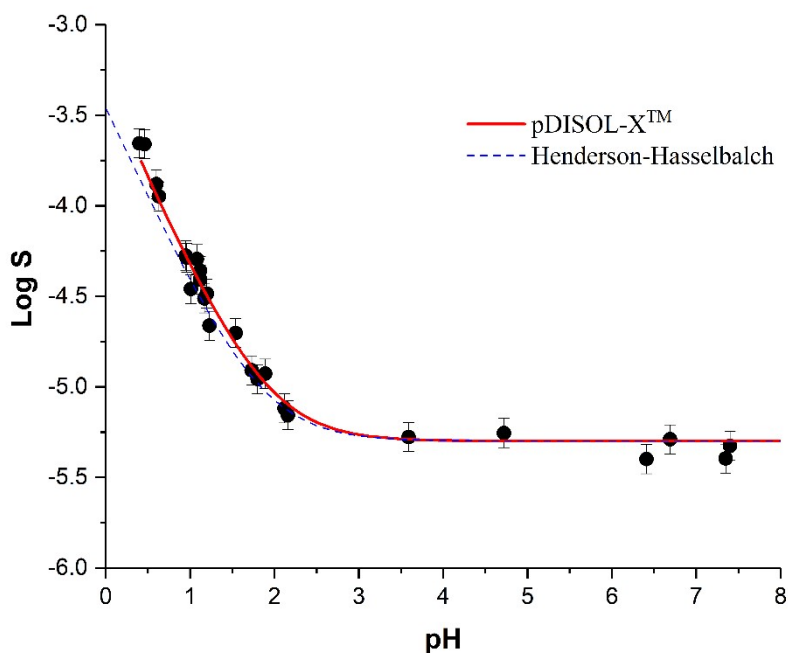

**Figure S25.** Experimental solubility–pH dependences for [ISV-H<sub>2</sub>O] obtained by dissolution of [ISV-H<sub>2</sub>O] (1:1), [ISV-P] (1:1) and [ISV-TS] (1:1) in buffer solutions with different pH values at 37 °C. The solid red line represents the best-fit refinement curve through the measured logS–pH points using the pDISOL-X™ program. The dashed blue curve refers to the profile calculated from the Henderson-Hasselbalch equation

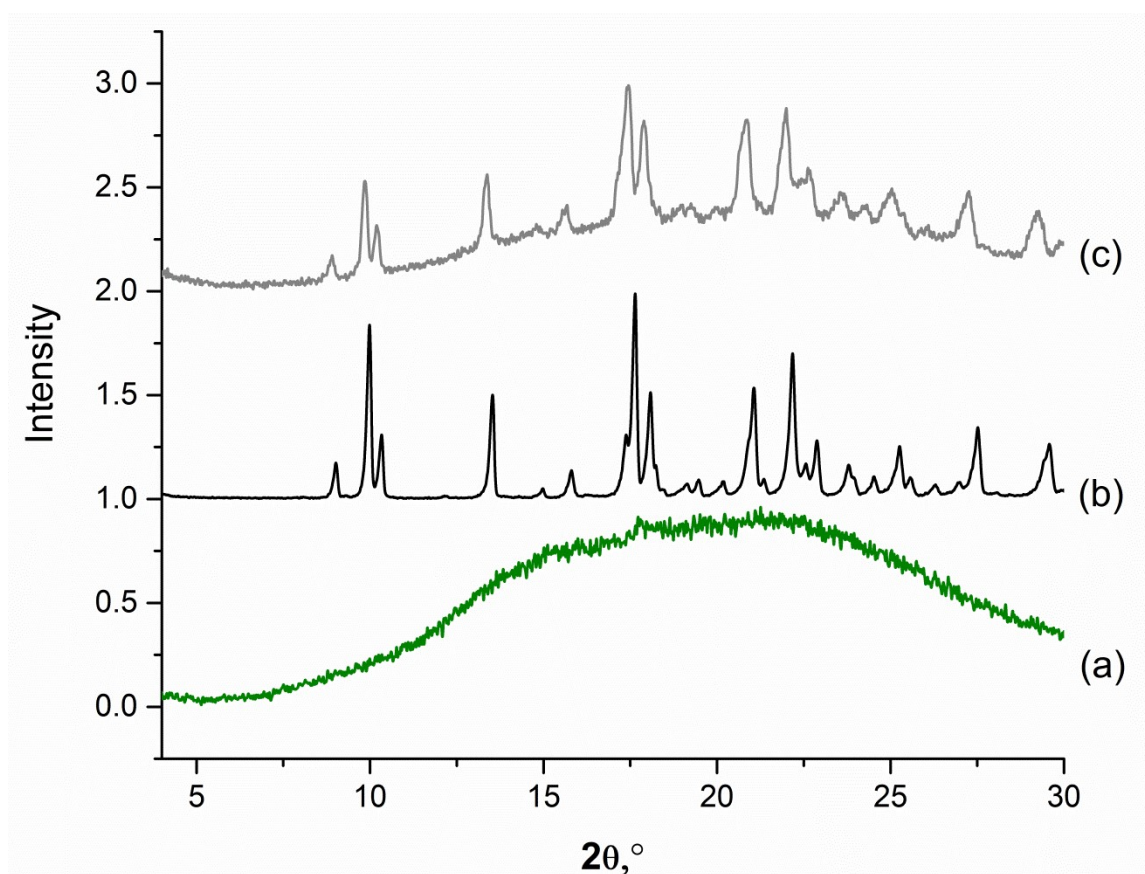

**Figure S26.** Experimental PXRD patterns of initial amorphous ISV (a), ISV<sub>CR</sub> (b), and the surface of the pressed tablet for the dissolution tests



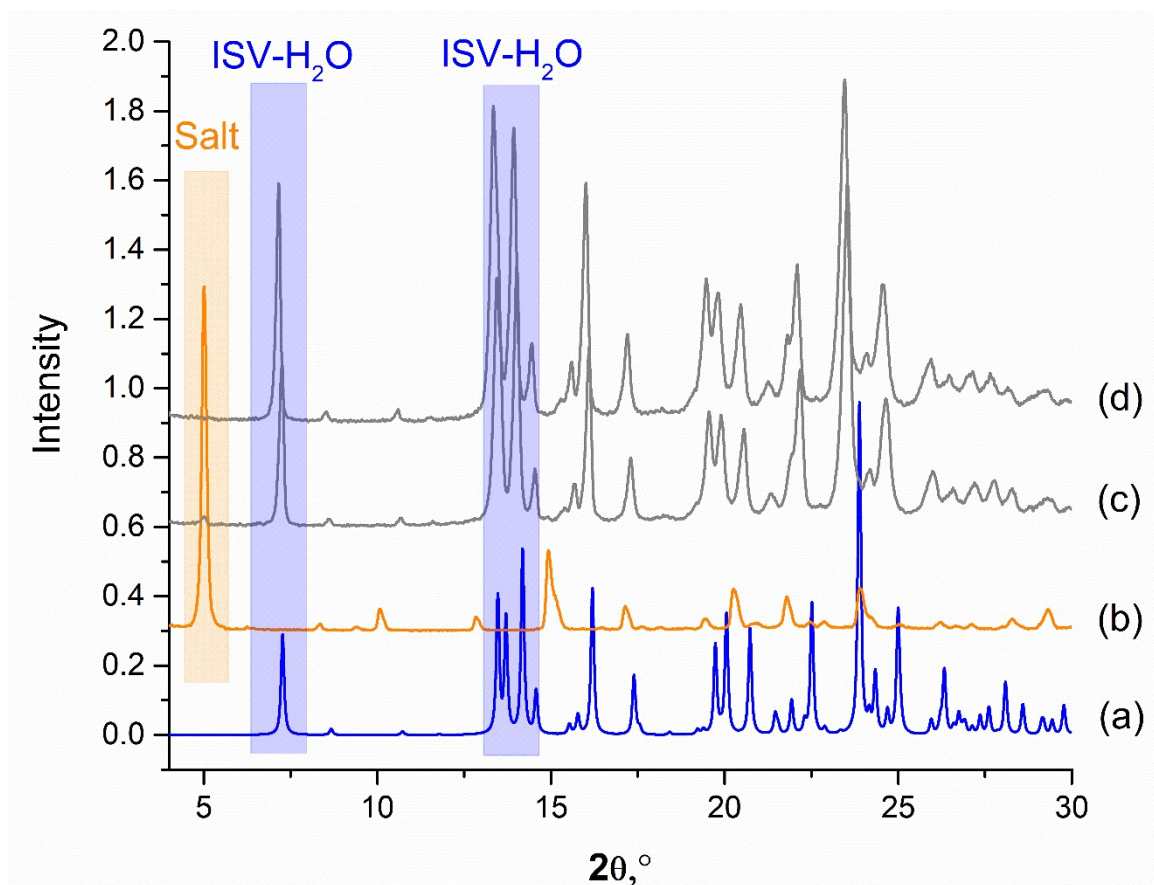

**Figure S27.** Experimental PXRD patterns of [ISV-H<sub>2</sub>O] (1:1) (a), [ISV-P] (1:1) (b) and the solid phase after 8h IDR experiments of [ISV-P] (1:1) in pH 1.2 (c) and pH 7.4 (d) buffer media.

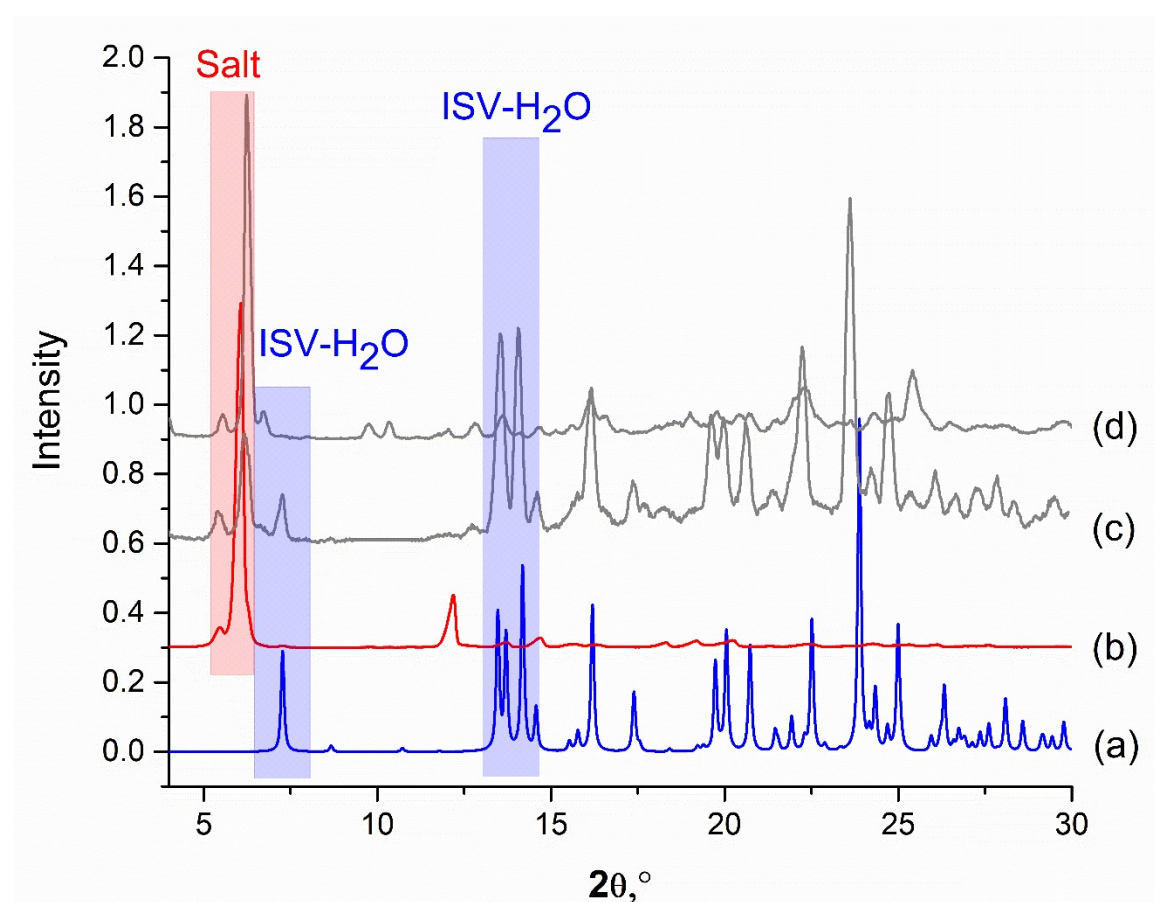

**Figure S28.** Experimental PXRD patterns of [ISV-H<sub>2</sub>O] (1:1) (a), [ISV-TS] (1:1) (b), surface layer of the tablet (c) and main body of the tablet (d) after 8h IDR experiments of [ISV-TS] (1:1) in pH 1.2 buffer media.



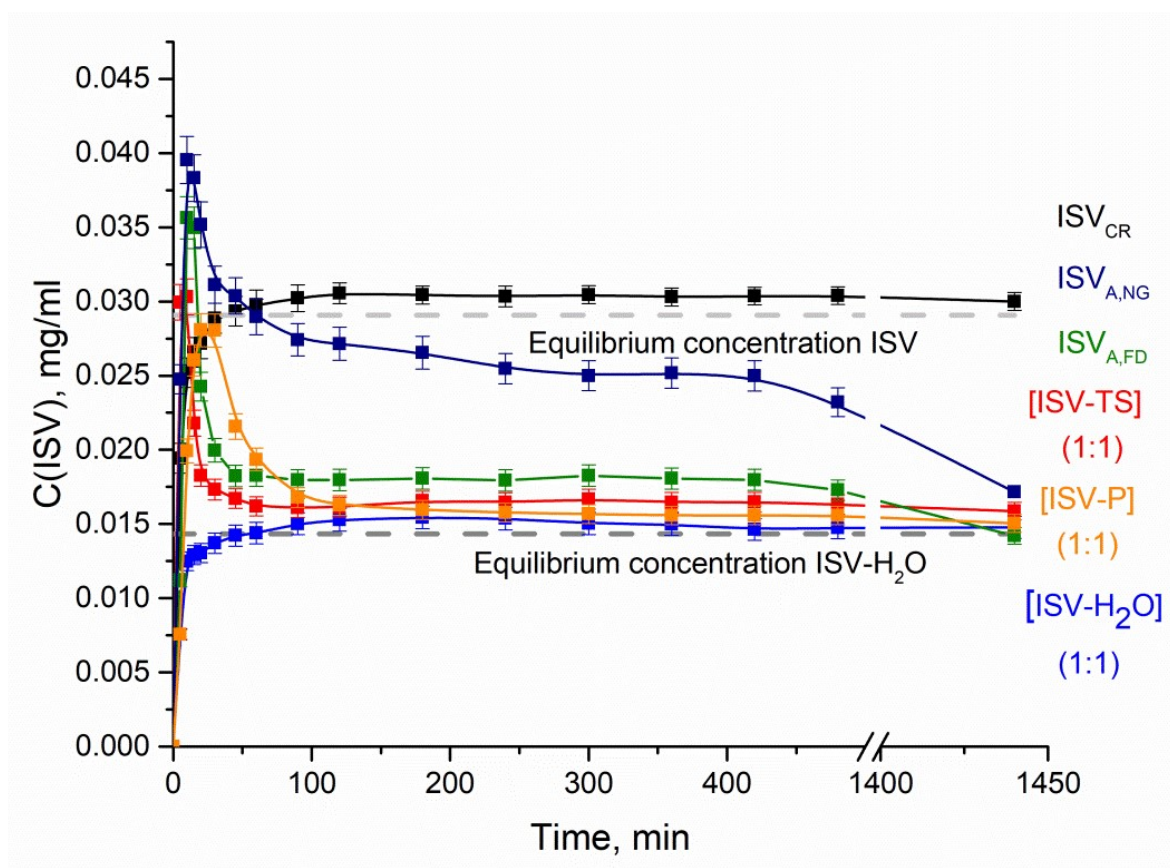

(a)

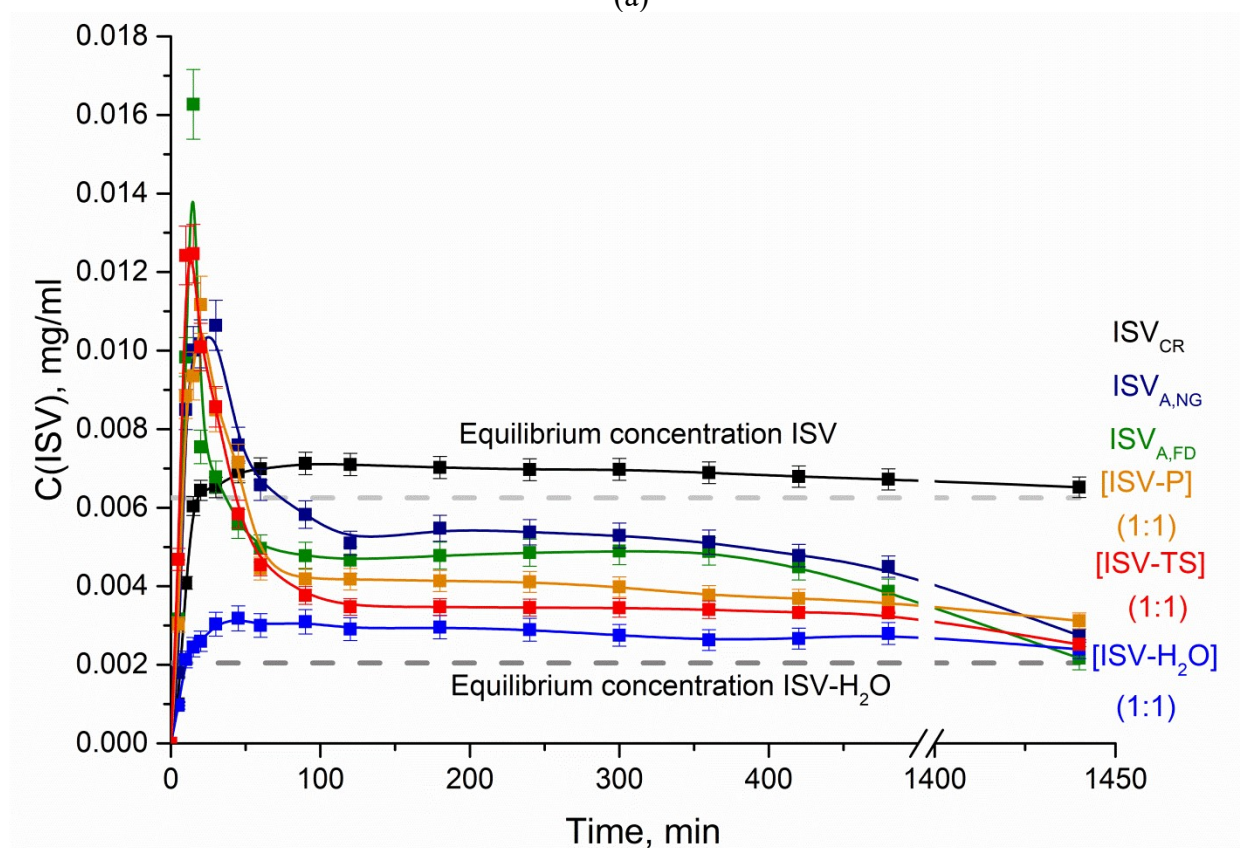

(b)

**Figure S29.** Dissolution curves for the initial  $\text{ISV}_{\text{CR}}$ ,  $[\text{ISV-H}_2\text{O}]$  (1:1),  $[\text{ISV-TS}]$  (1:1),  $[\text{ISV-P}]$  (1:1),  $\text{ISV}_{\text{A,FD}}$  and  $\text{ISV}_{\text{A,NG}}$  in pH 1.2 (a) and pH 7.4 (b) buffer solutions at 37.0 ± 0.1 °C.
